# Supplementary material for: Food Anticipatory Activity Behavior of Mice across a Wide Range of Circadian and Non-Circadian Intervals
Source: PubMed Central journal article supplement (PMC3360658; doi:10.1371/journal.pone.0037992), 2012-05-25

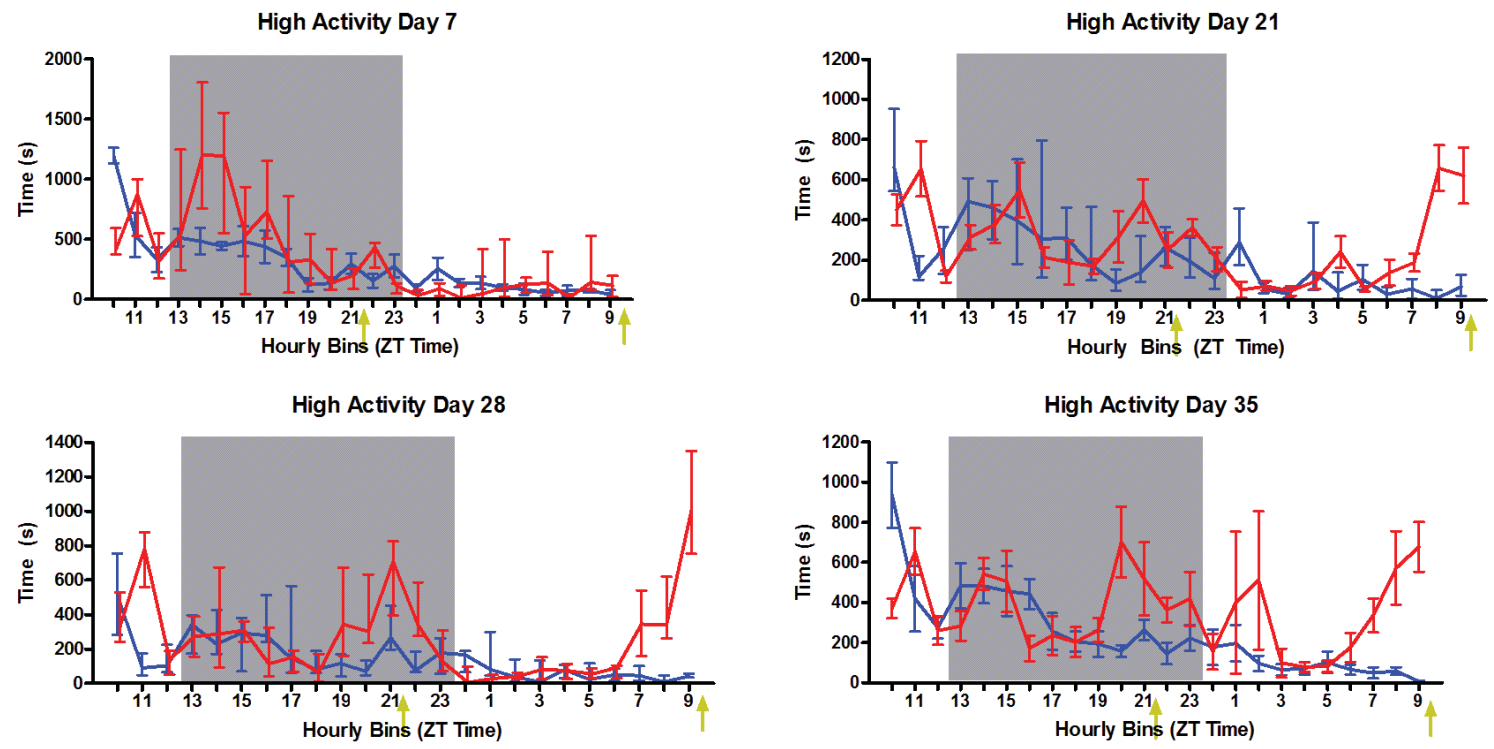

## Day 7

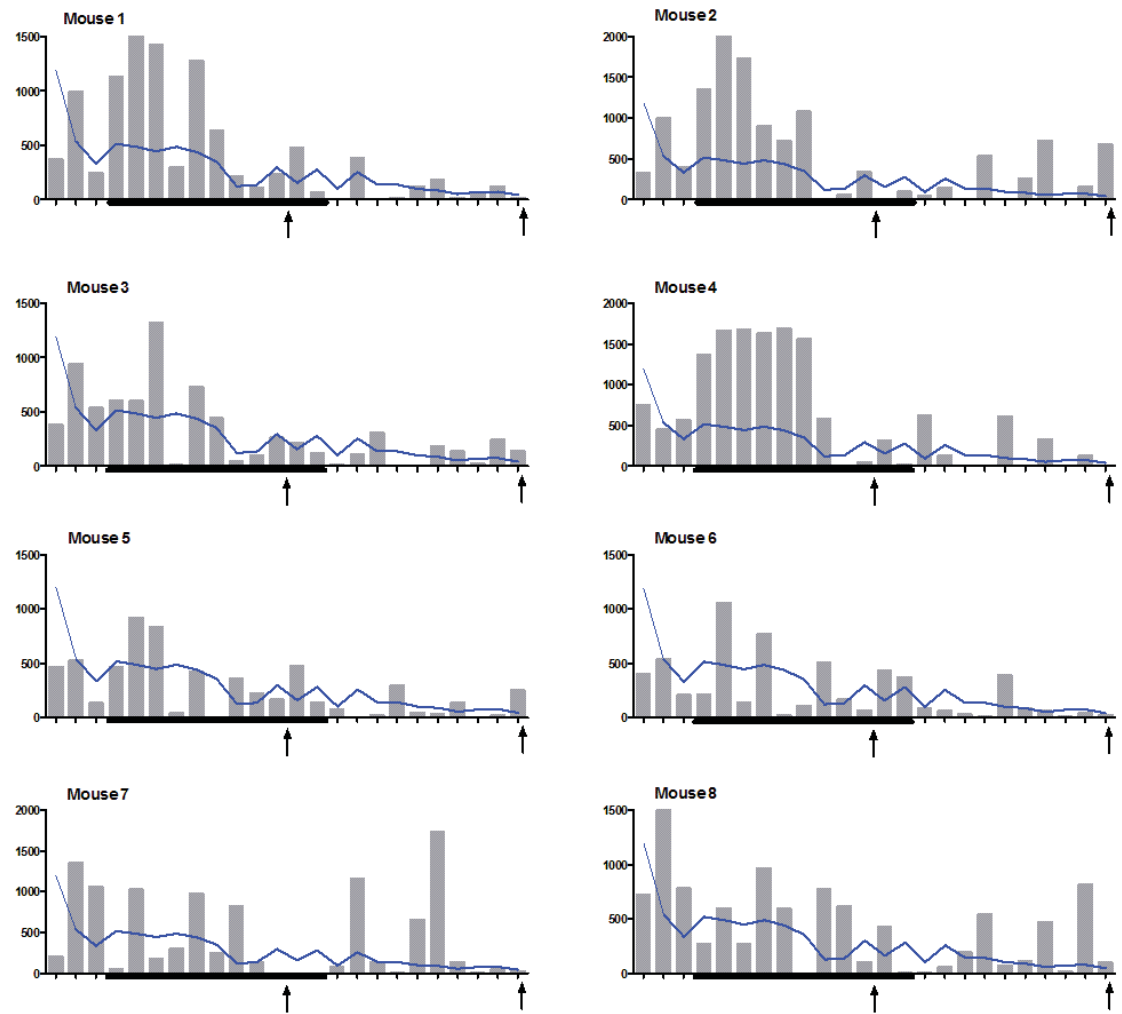

## Day 14

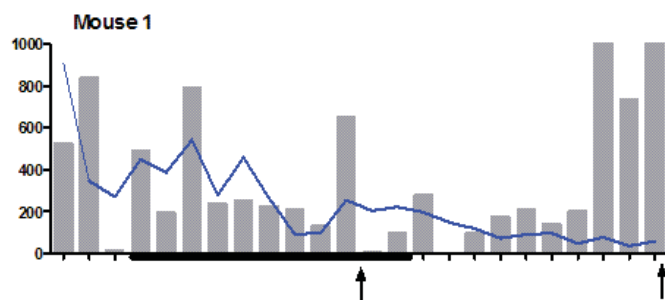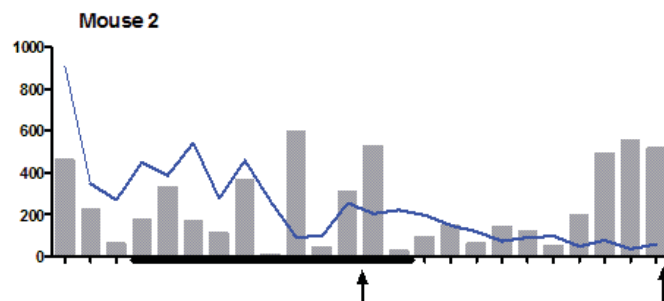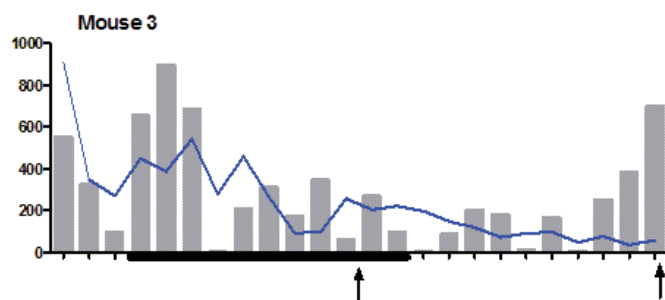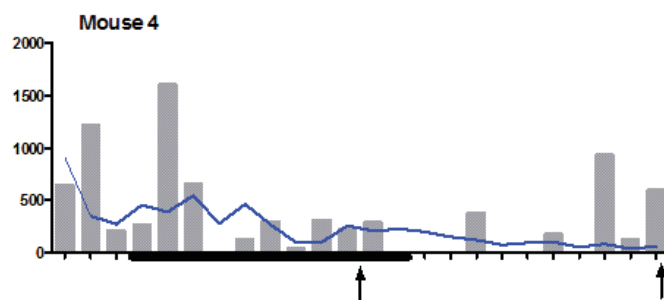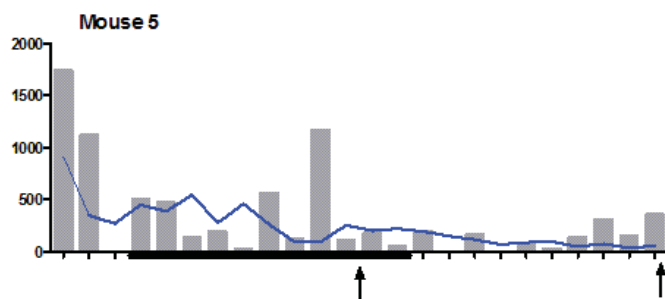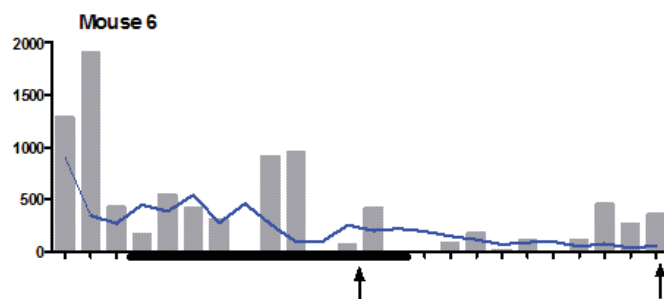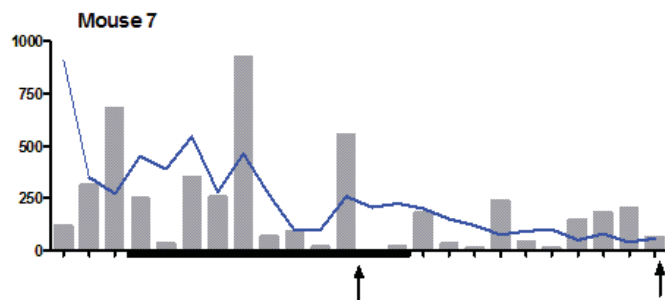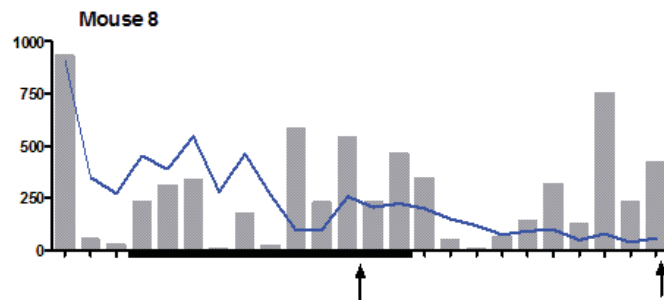

## Day 21

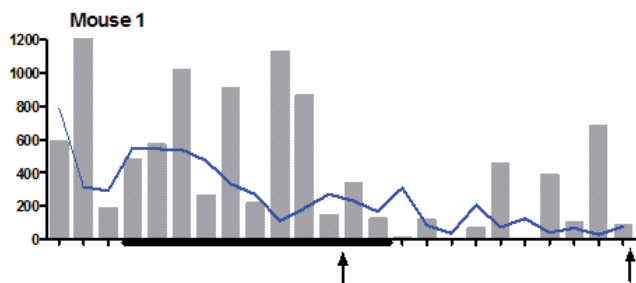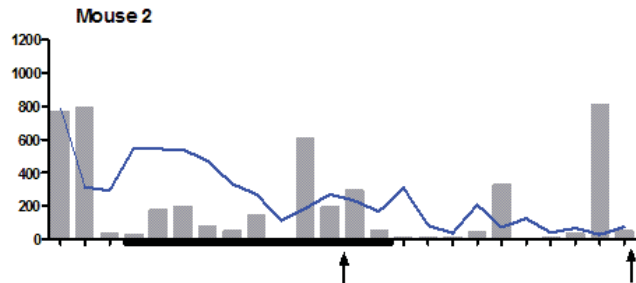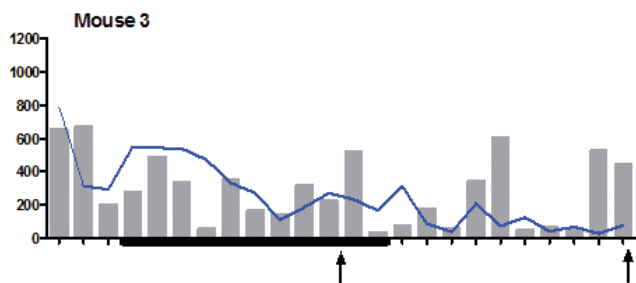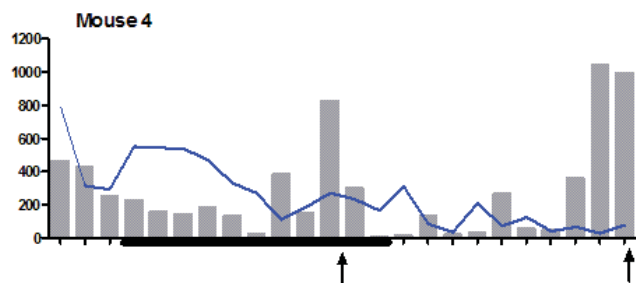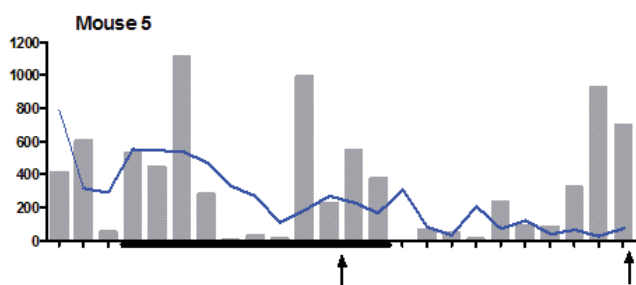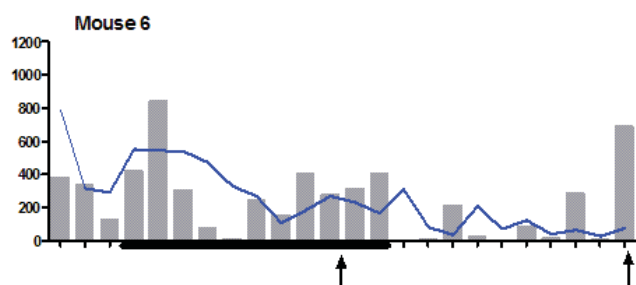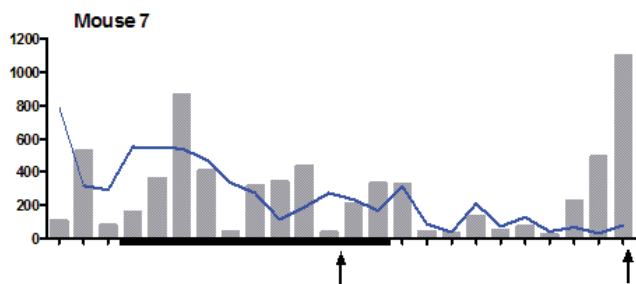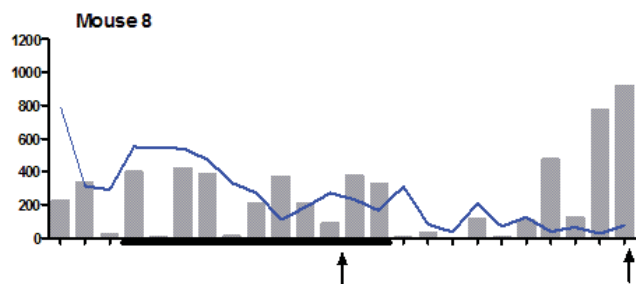

## Day 28

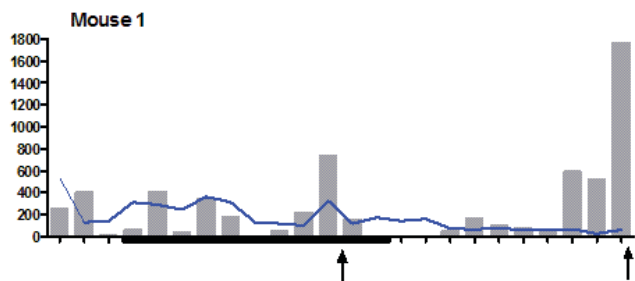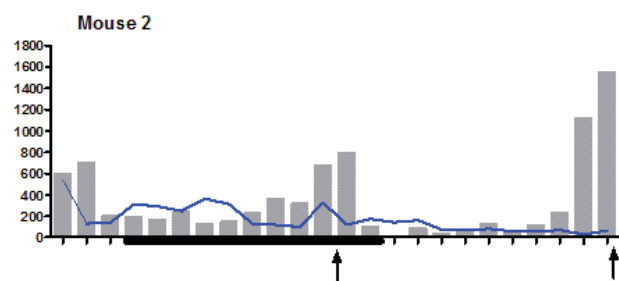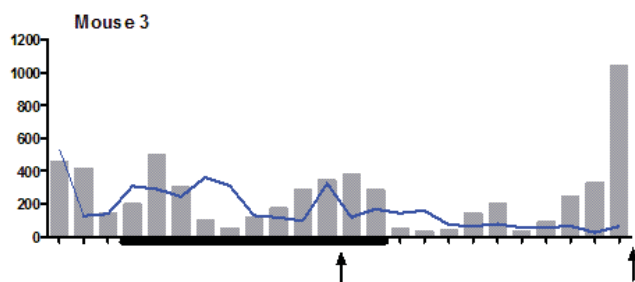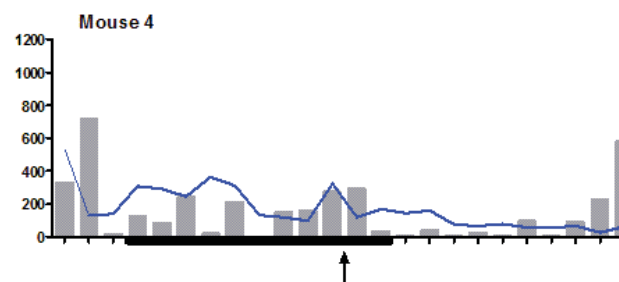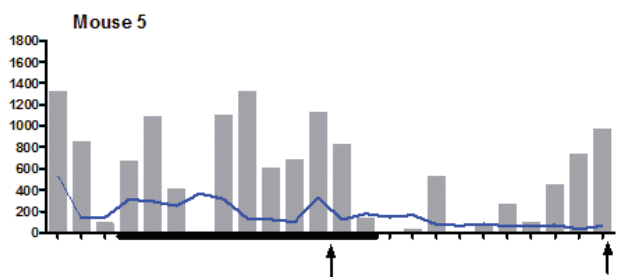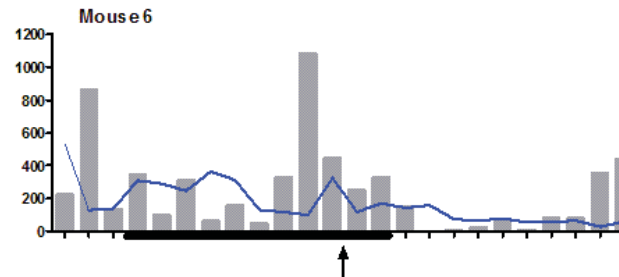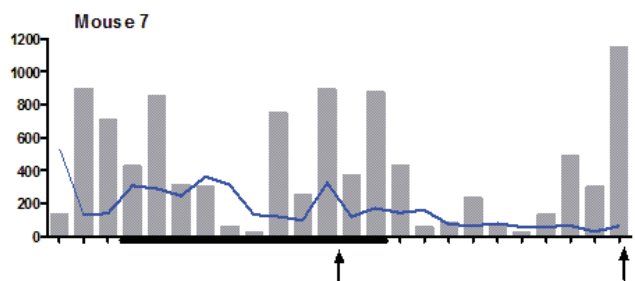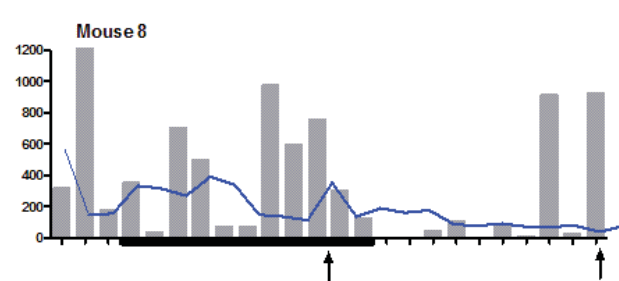

## Day 35

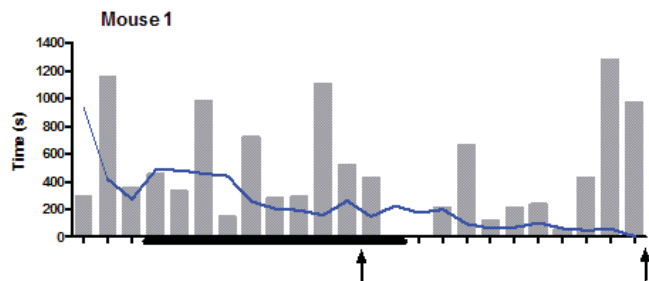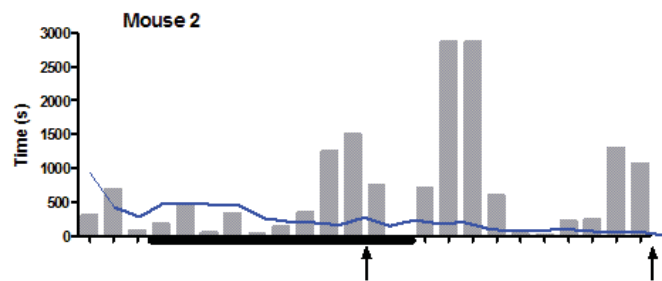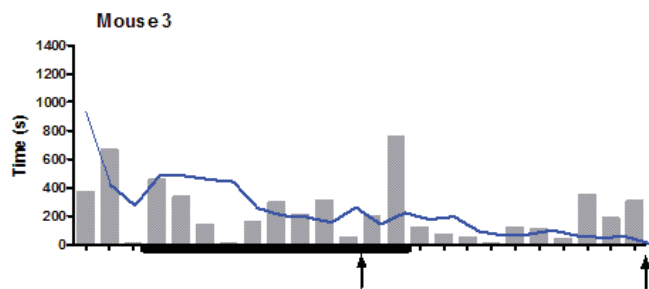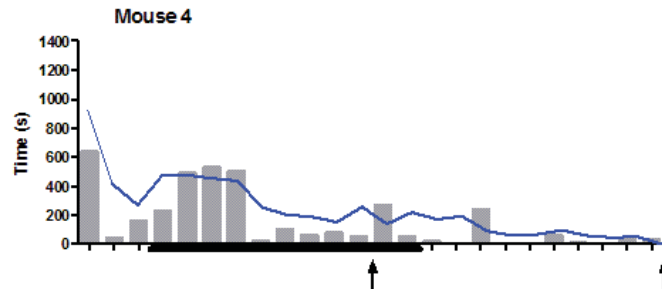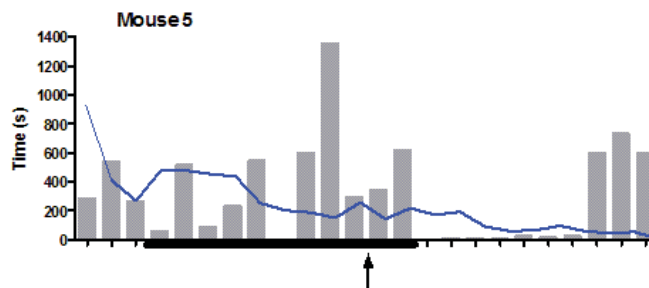

## Day 42

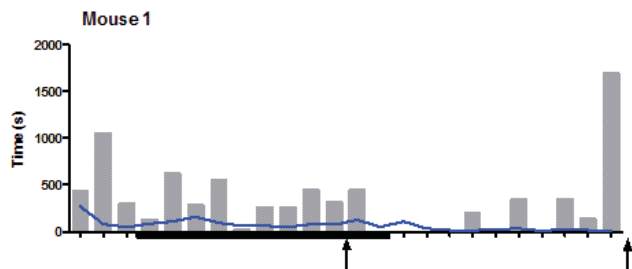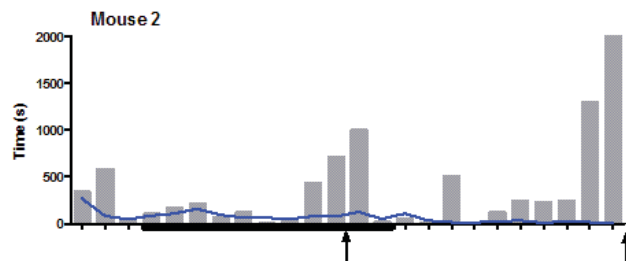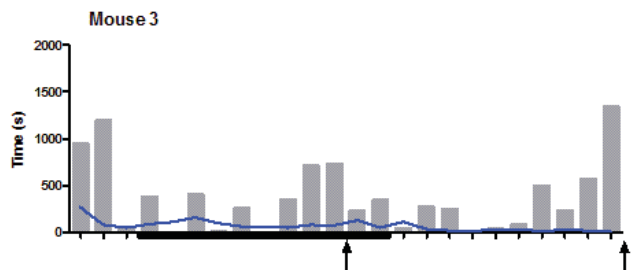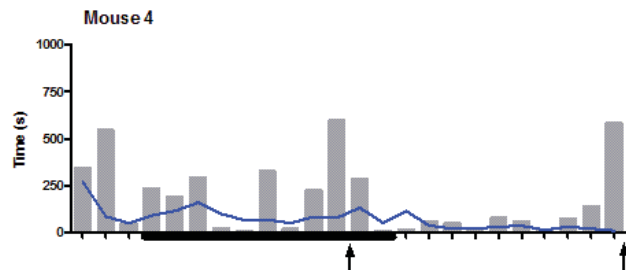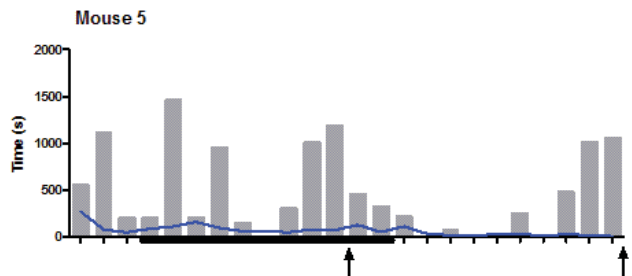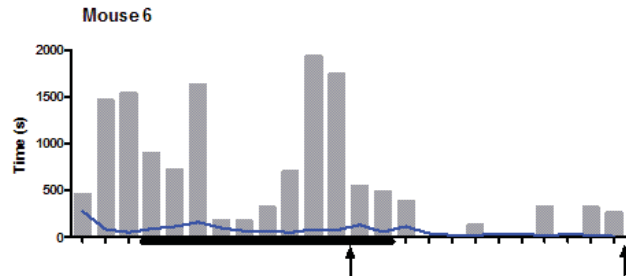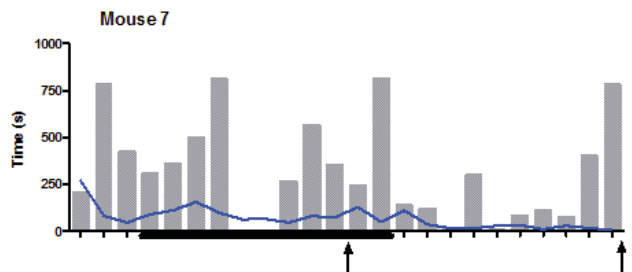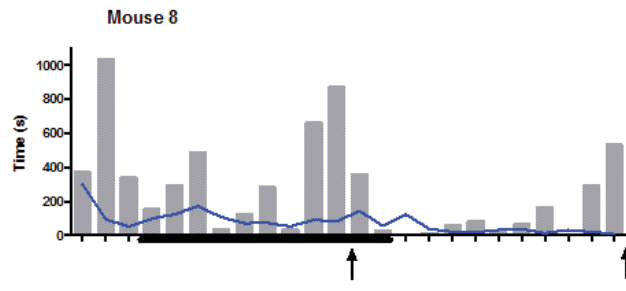

Supplement: pone.0037992.s002.pdf [file pone.0037992.s002.pdf]
