# Supplementary material for: Food Anticipatory Activity Behavior of Mice across a Wide Range of Circadian and Non-Circadian Intervals
Source: PubMed Central journal article supplement (PMC3360658; doi:10.1371/journal.pone.0037992), 2012-05-25

— 6X AL  
— 6X CR

Supplemental Figure 6

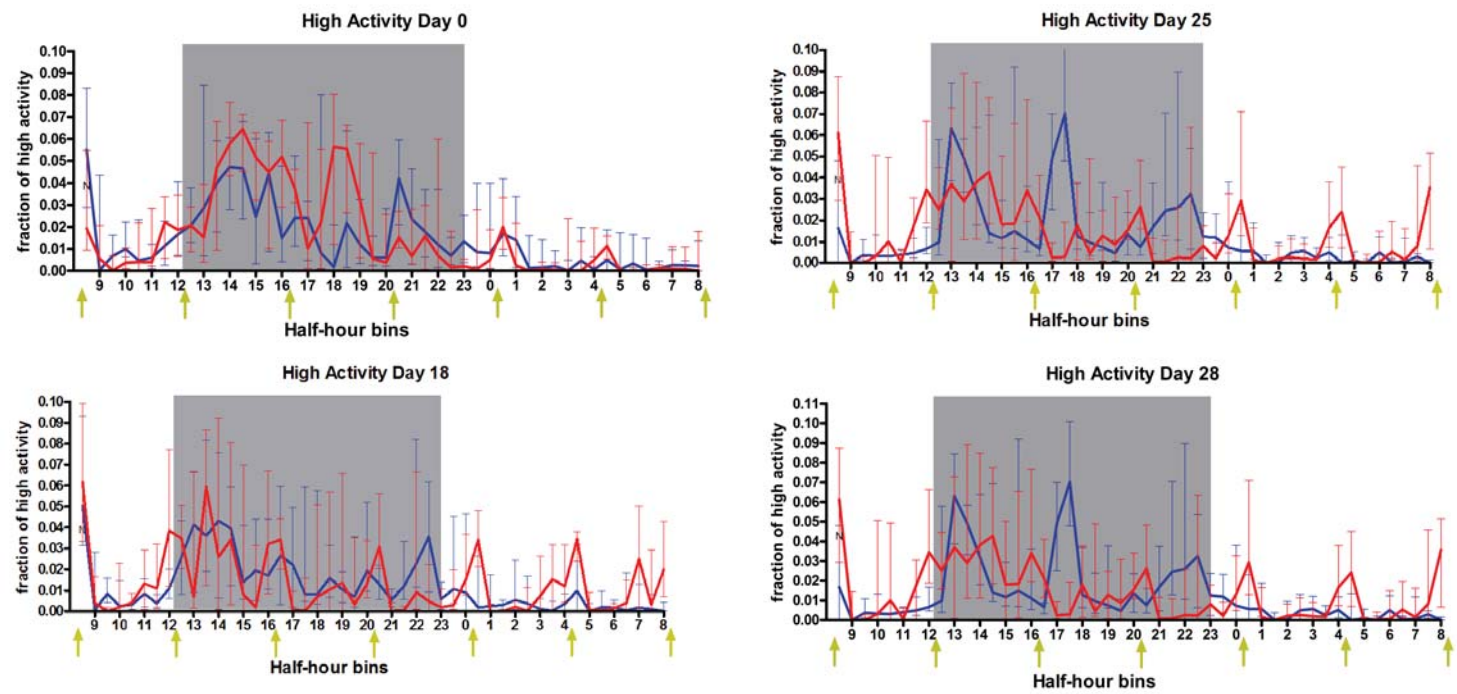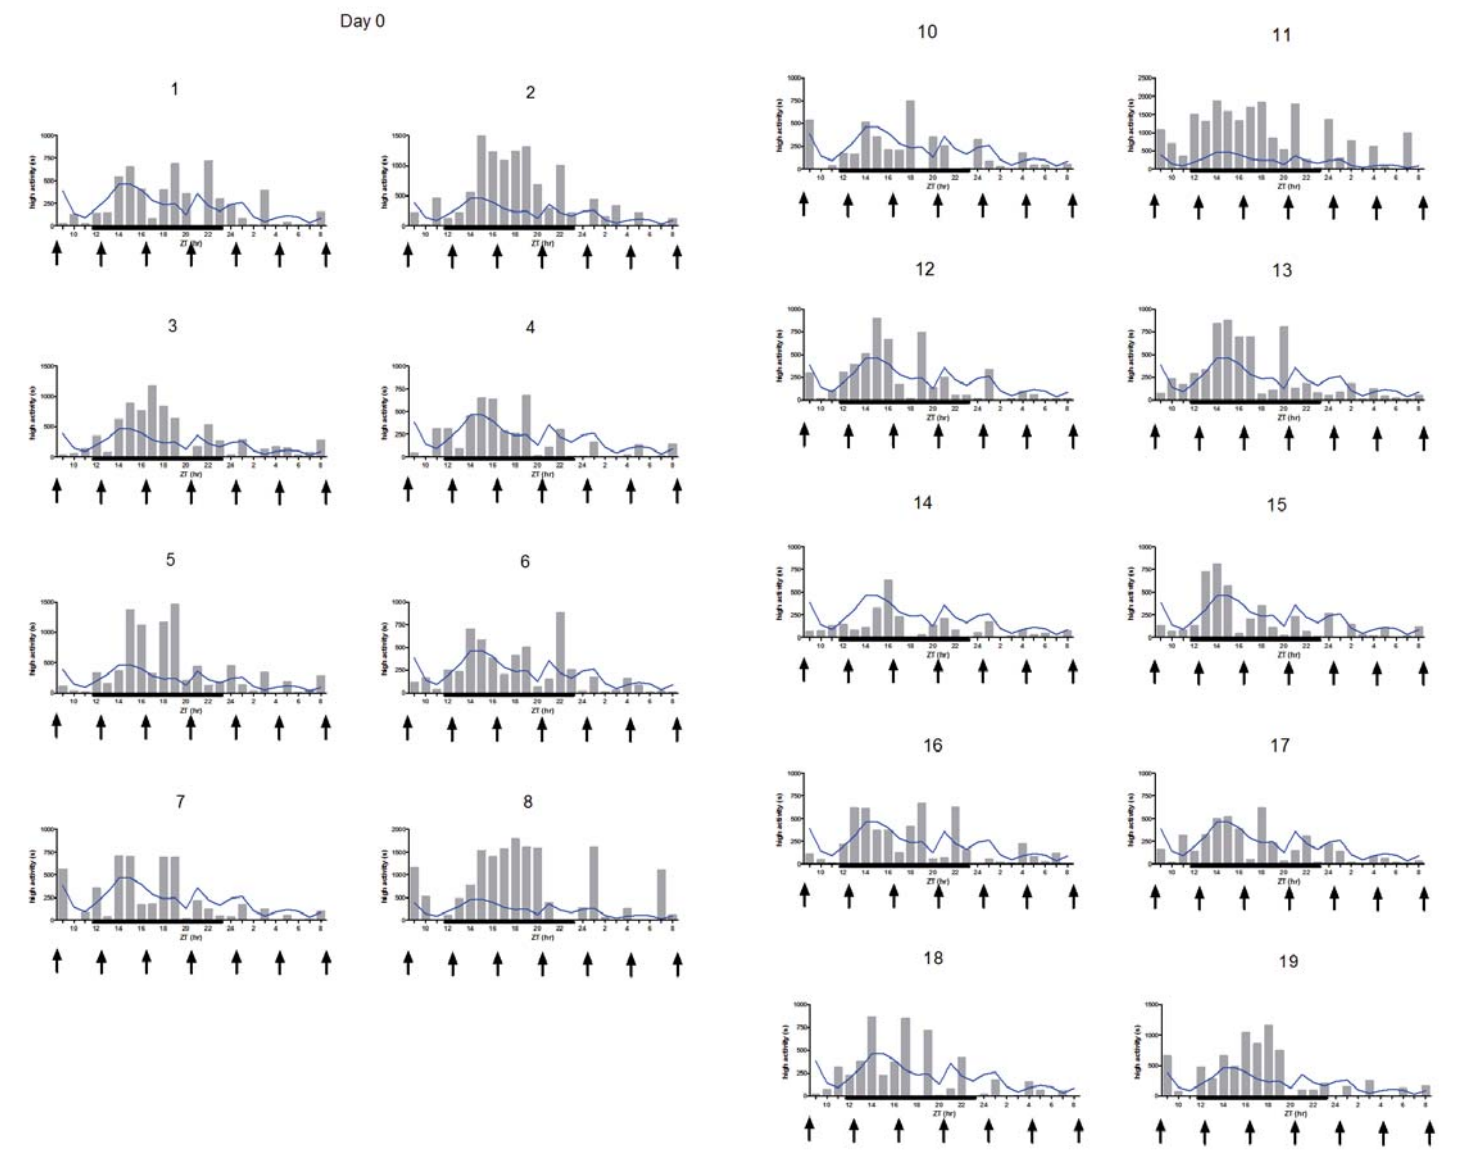

Day 10

1

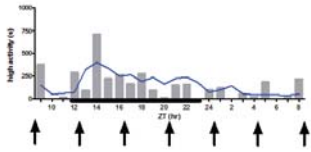

2

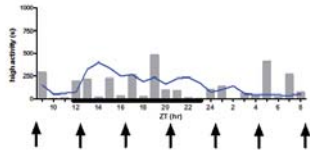

9

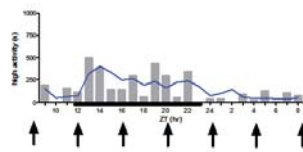

10

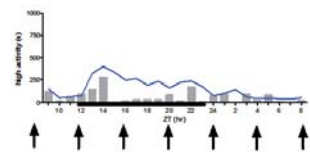

3

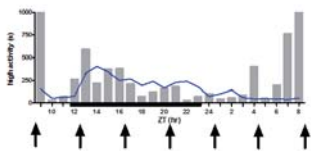

4

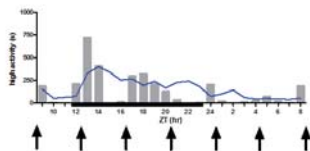

11

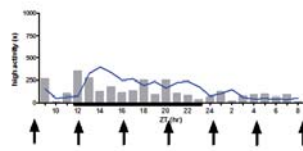

12

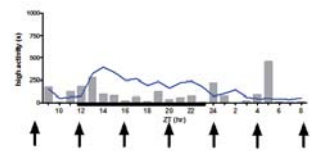

5

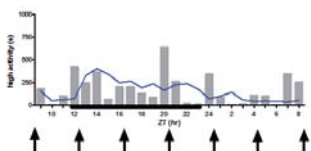

6

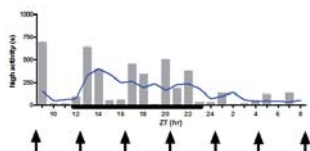

13

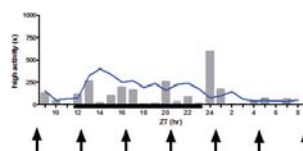

14

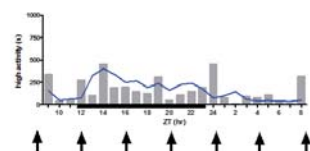

7

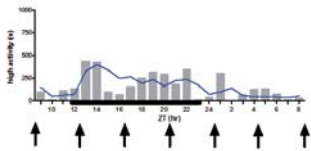

8

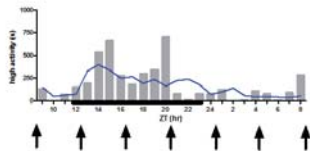

15

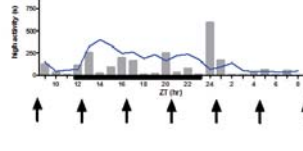

17

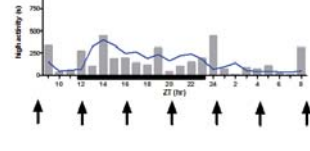

19

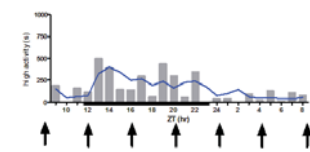

Day 14

1

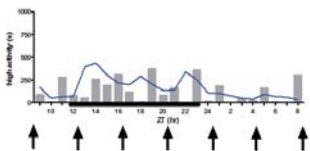

2

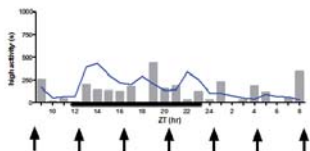

9

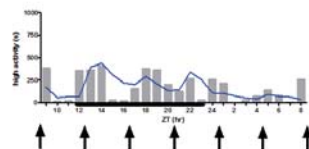

10

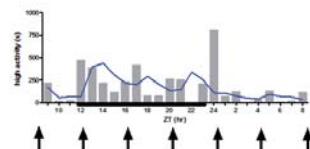

3

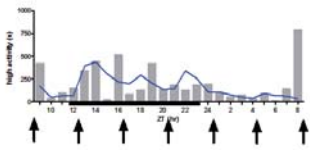

4

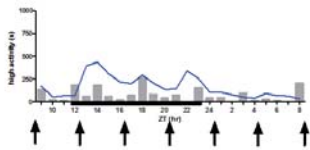

11

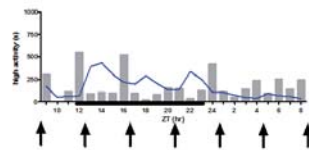

12

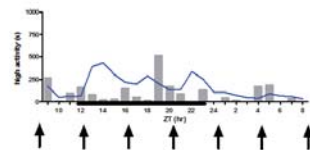

5

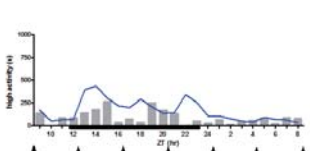

6

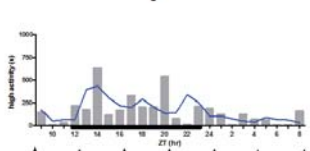

13

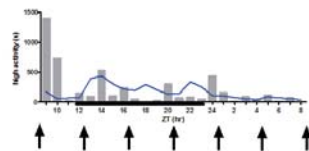

14

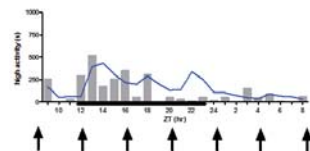

7

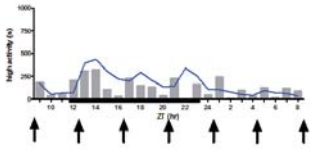

8

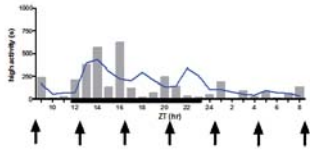

15

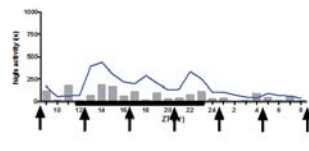

17

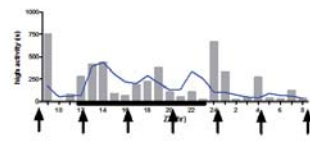

19

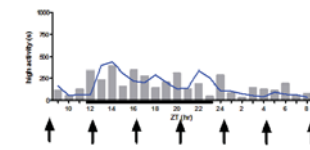

# Supplemental Figure 6 (continued)

Day 18

1

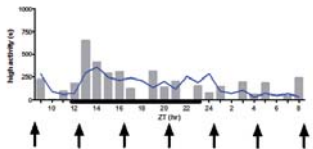

2

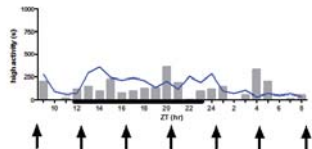

11

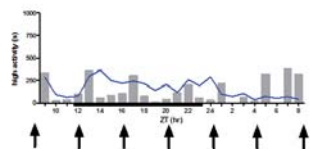

12

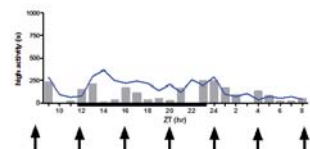

3

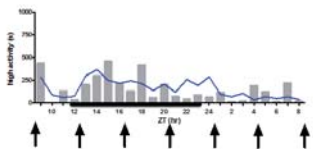

4

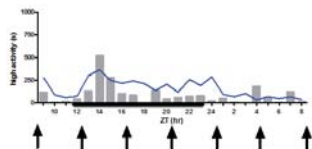

13

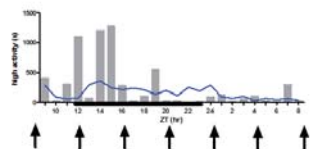

14

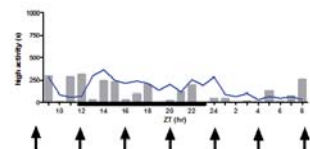

5

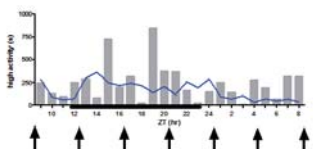

6

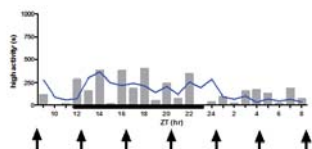

15

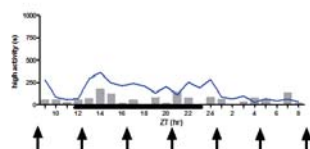

16

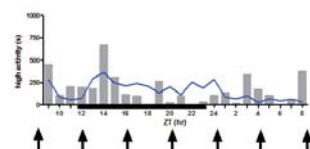

8

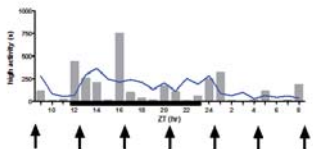

9

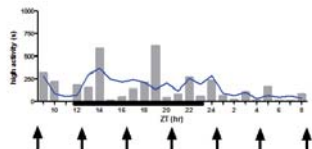

## Supplemental Figure 6 (continued)

Day 21

1

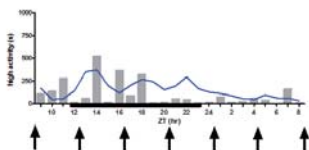

2

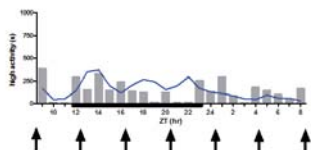

11

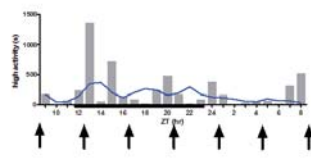

12

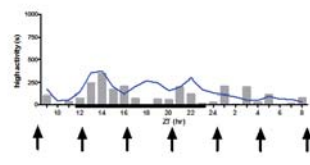

3

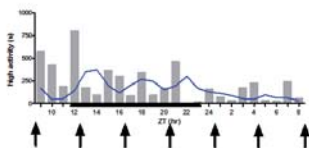

4

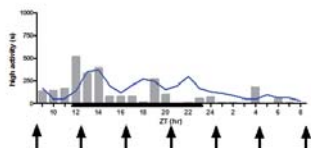

13

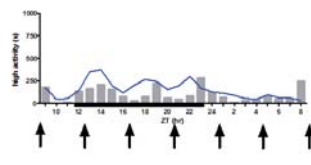

14

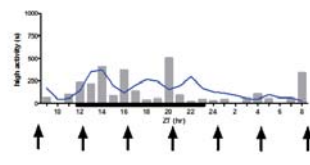

5

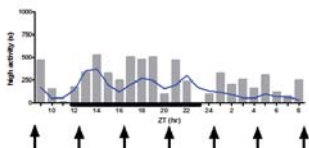

6

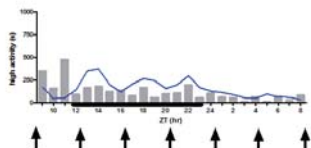

15

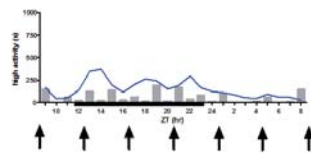

17

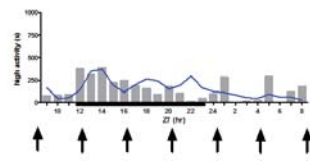

8

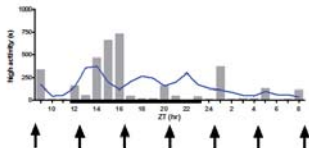

9

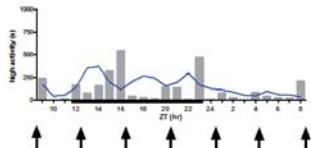

Day 24

1

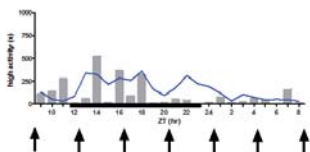

2

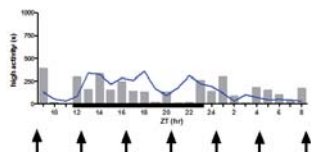

11

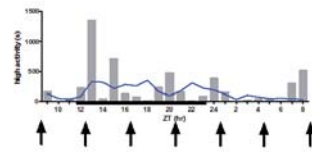

12

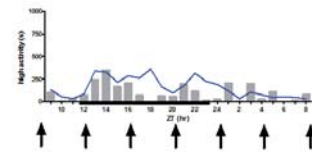

3

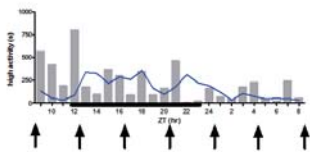

4

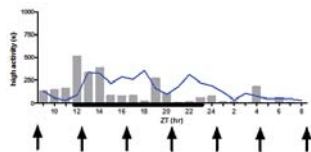

13

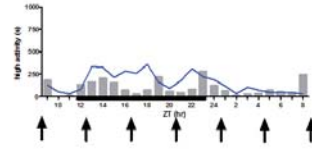

14

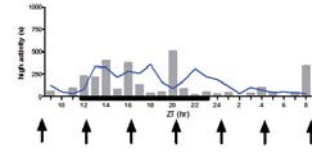

5

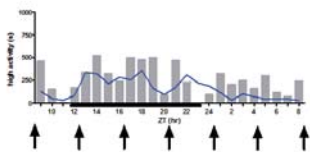

6

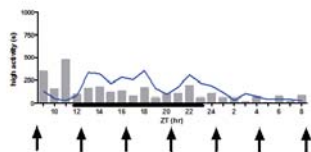

15

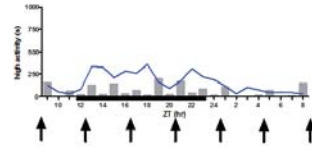

17

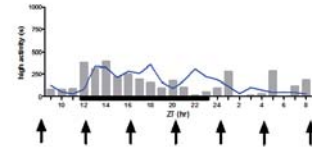

8

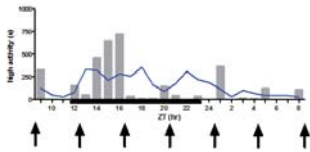

9

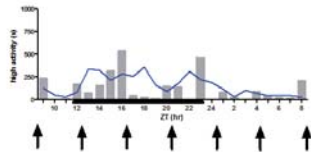

Day 29

1

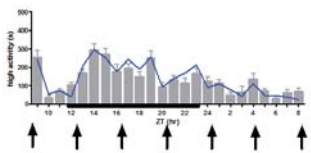

3

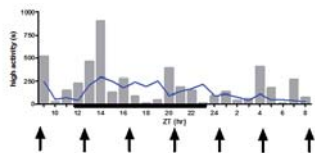

14

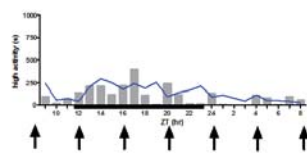

15

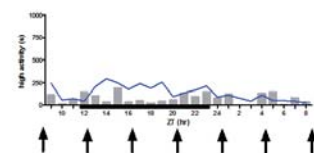

5

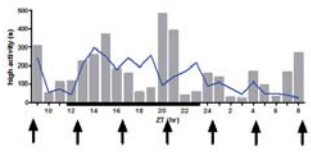

8

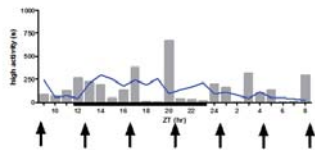

17

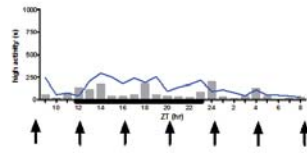

9

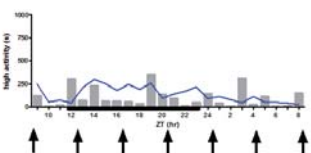

11

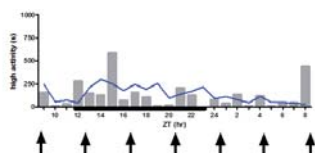

12

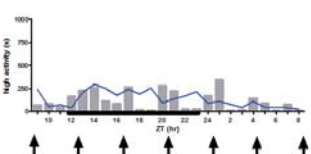

13

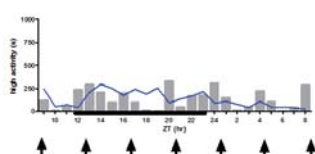

Day 32

1

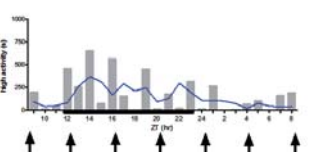

3

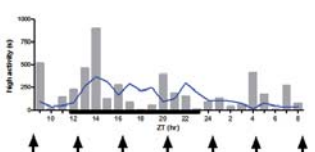

14

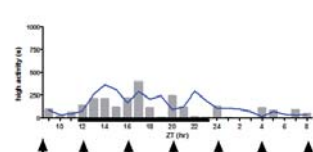

15

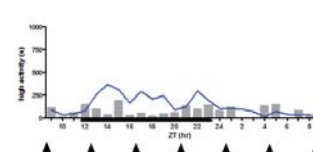

5

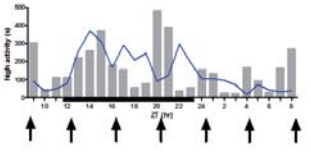

8

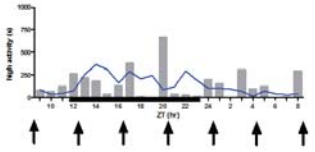

9

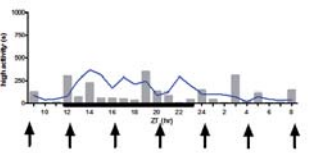

11

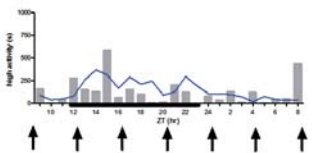

12

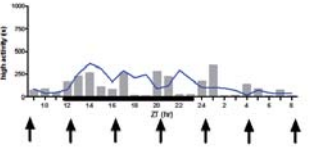

13

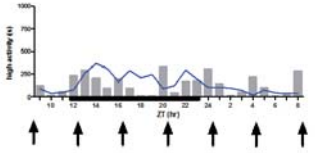

Day 35

1

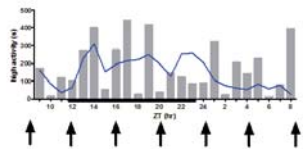

3

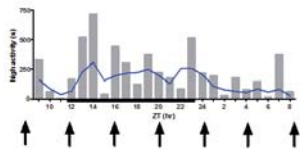

5

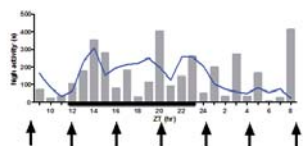

8

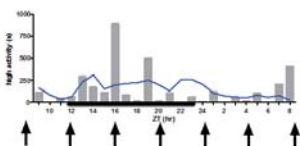

9

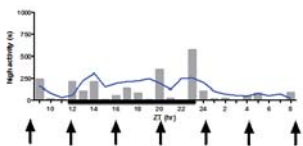

11

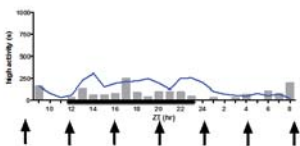

12

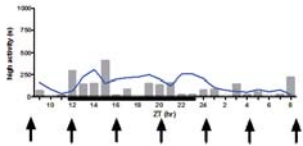

13

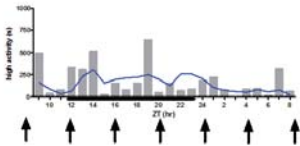

14

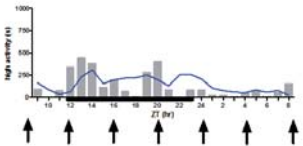

15

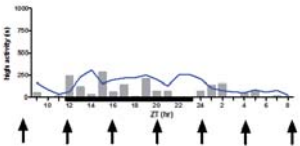

Day 38

8

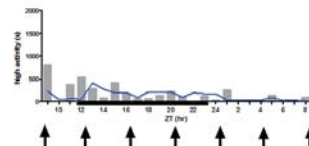

9

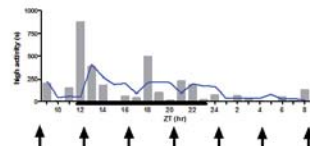

11

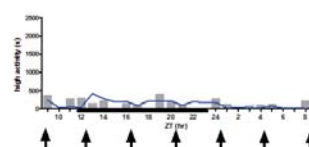

12

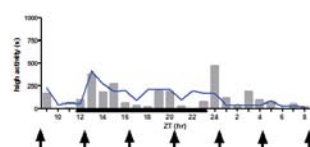

13

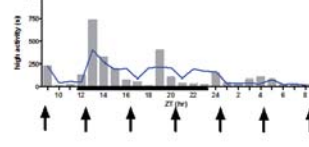

14

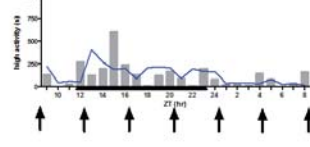

15

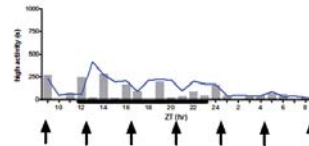



Days 42-43

1

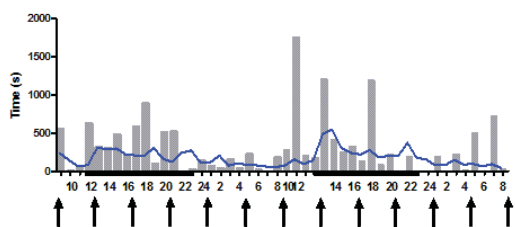

3

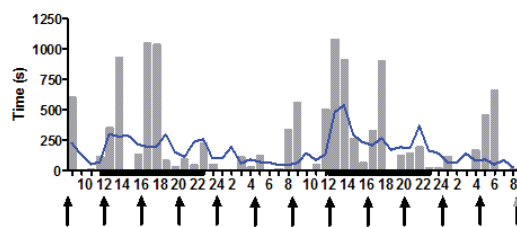

5

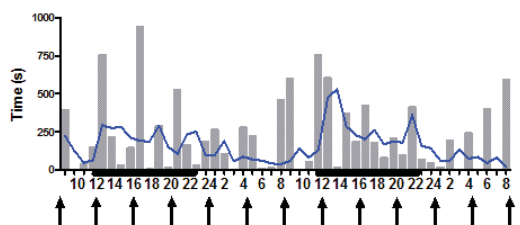

9

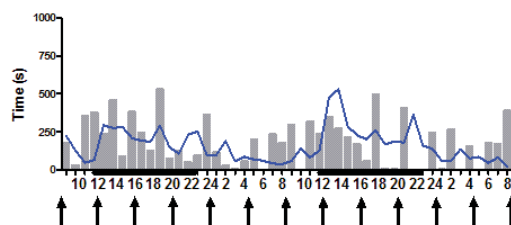

9

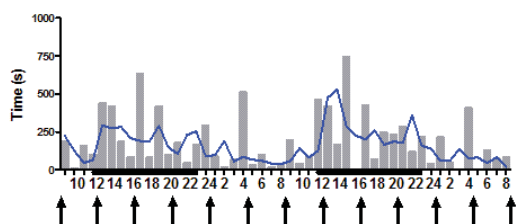

11

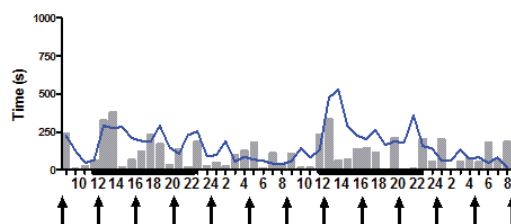

12

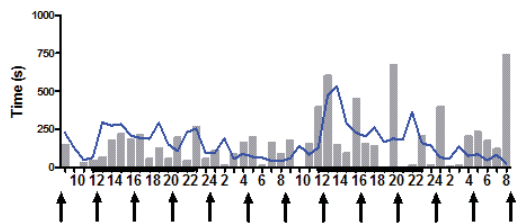

13

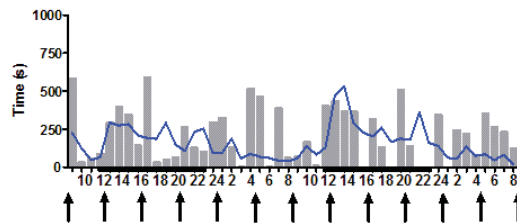

14

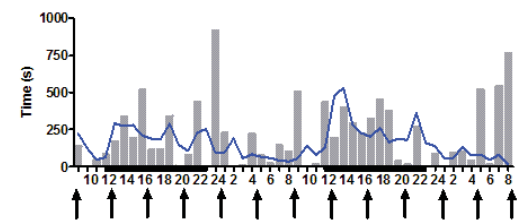

15

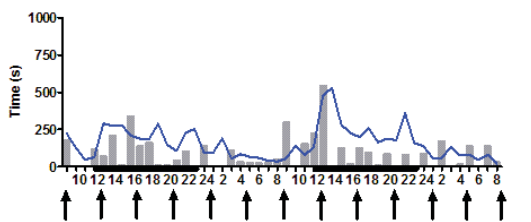

Supplement: pone.0037992.s006.pdf [file pone.0037992.s006.pdf]
