# Supplementary material for: Food Anticipatory Activity Behavior of Mice across a Wide Range of Circadian and Non-Circadian Intervals
Source: PubMed Central journal article supplement (PMC3360658; doi:10.1371/journal.pone.0037992), 2012-05-25

## 18hr Individual Data (Type "A")

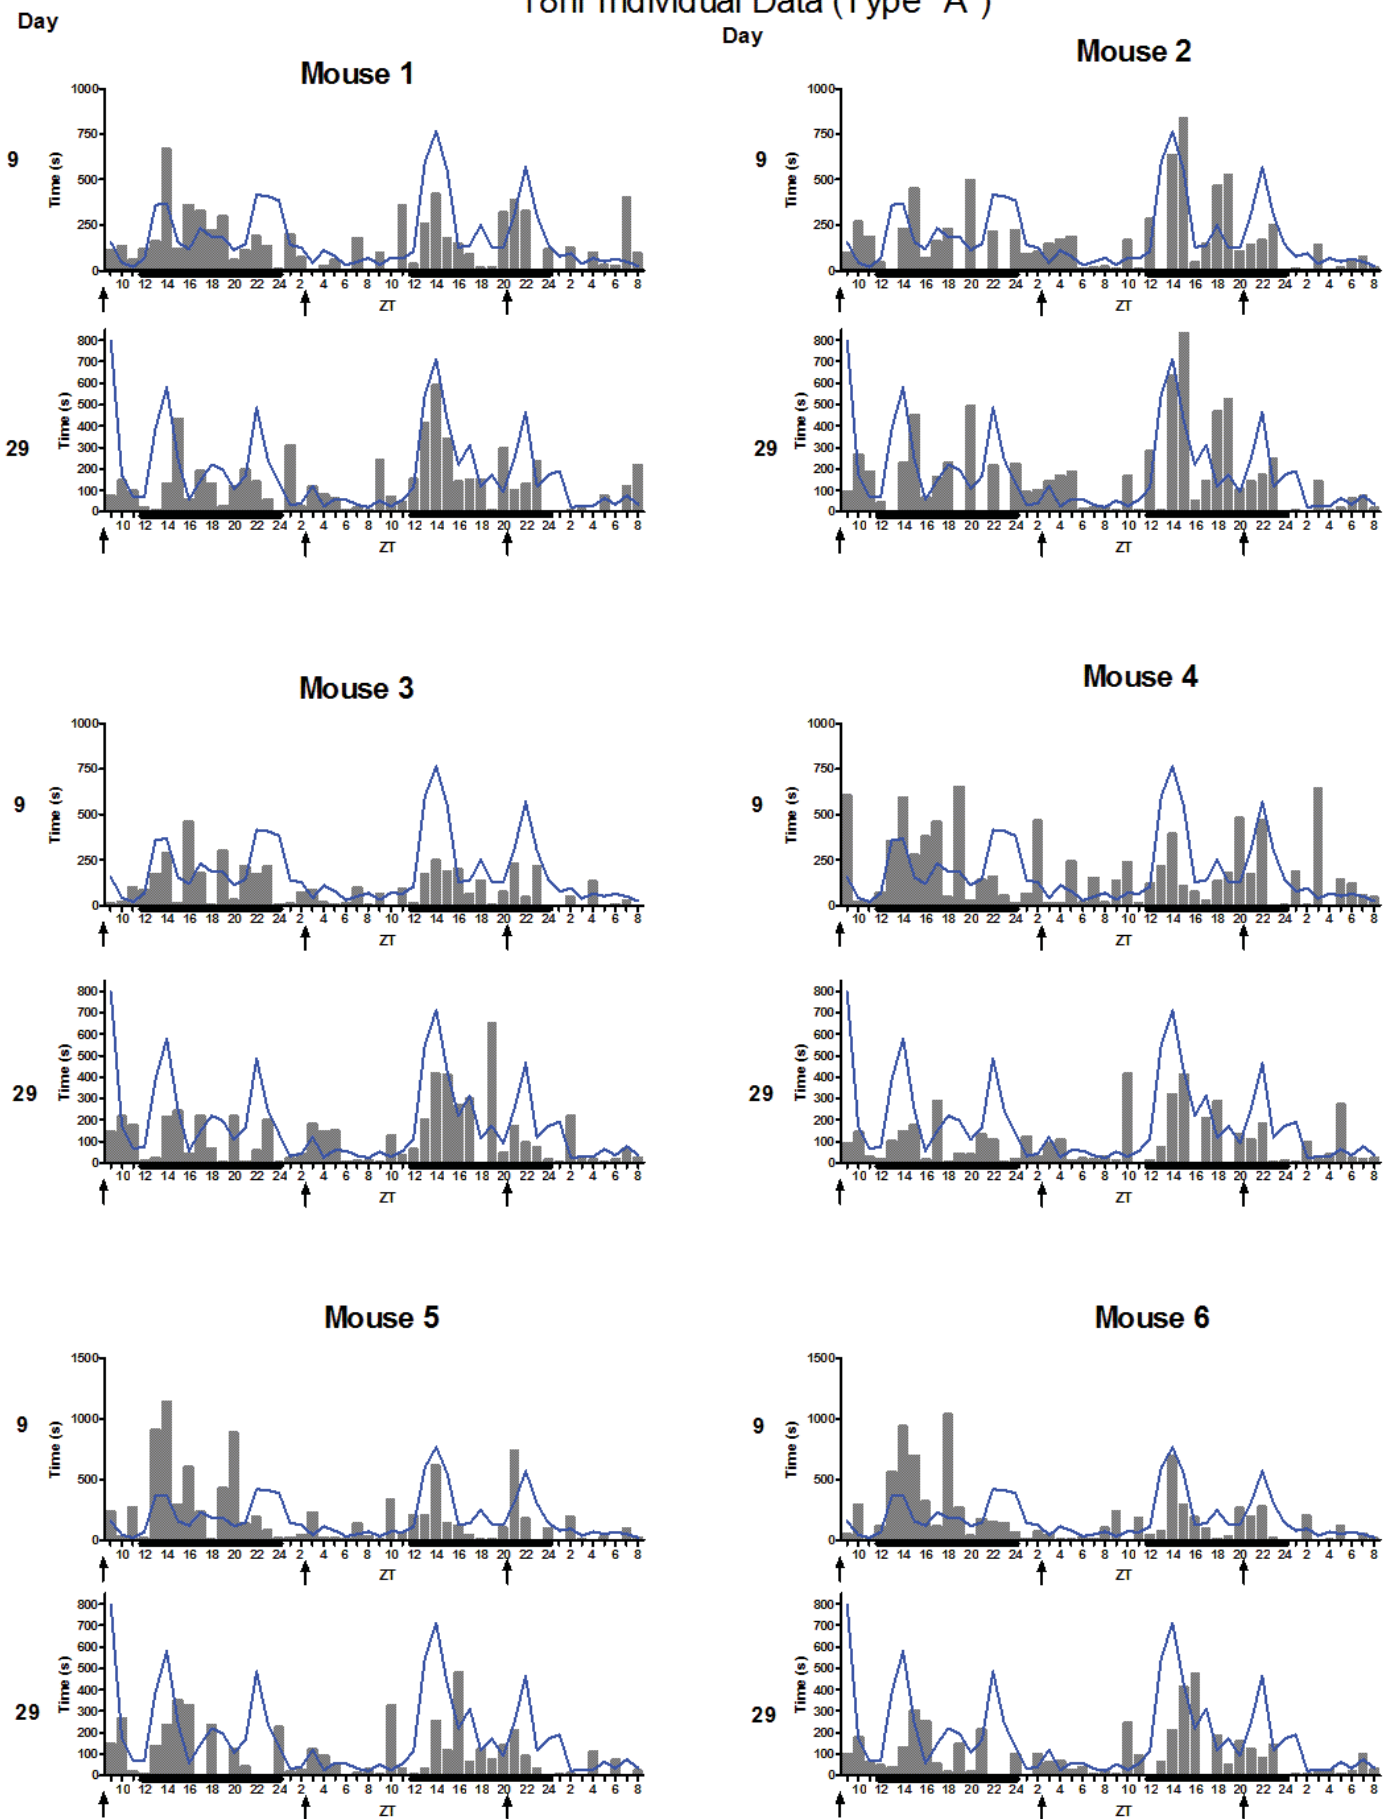

Day

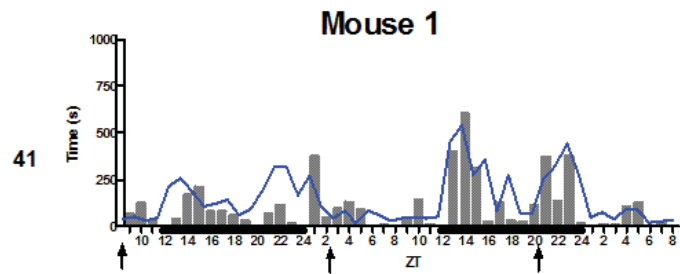

Day

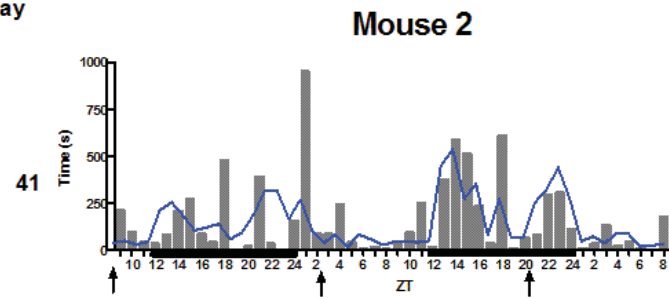

**Mouse 3**

41

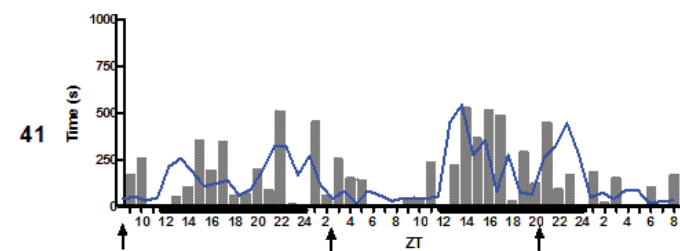

**Mouse 4**

41

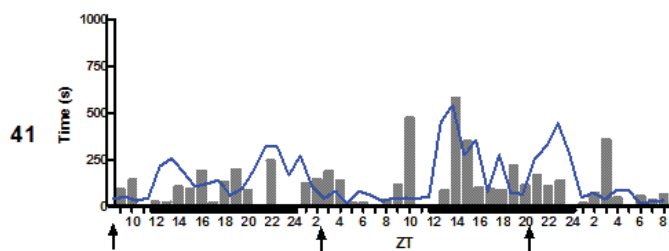

**Mouse 5**

41

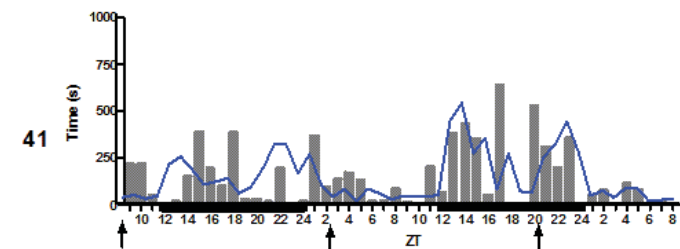

**Mouse 6**

41

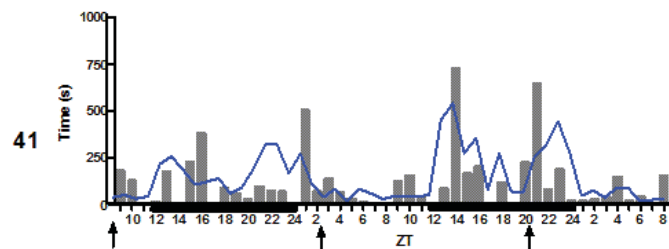

## 18hr Individual Data (Type "B")

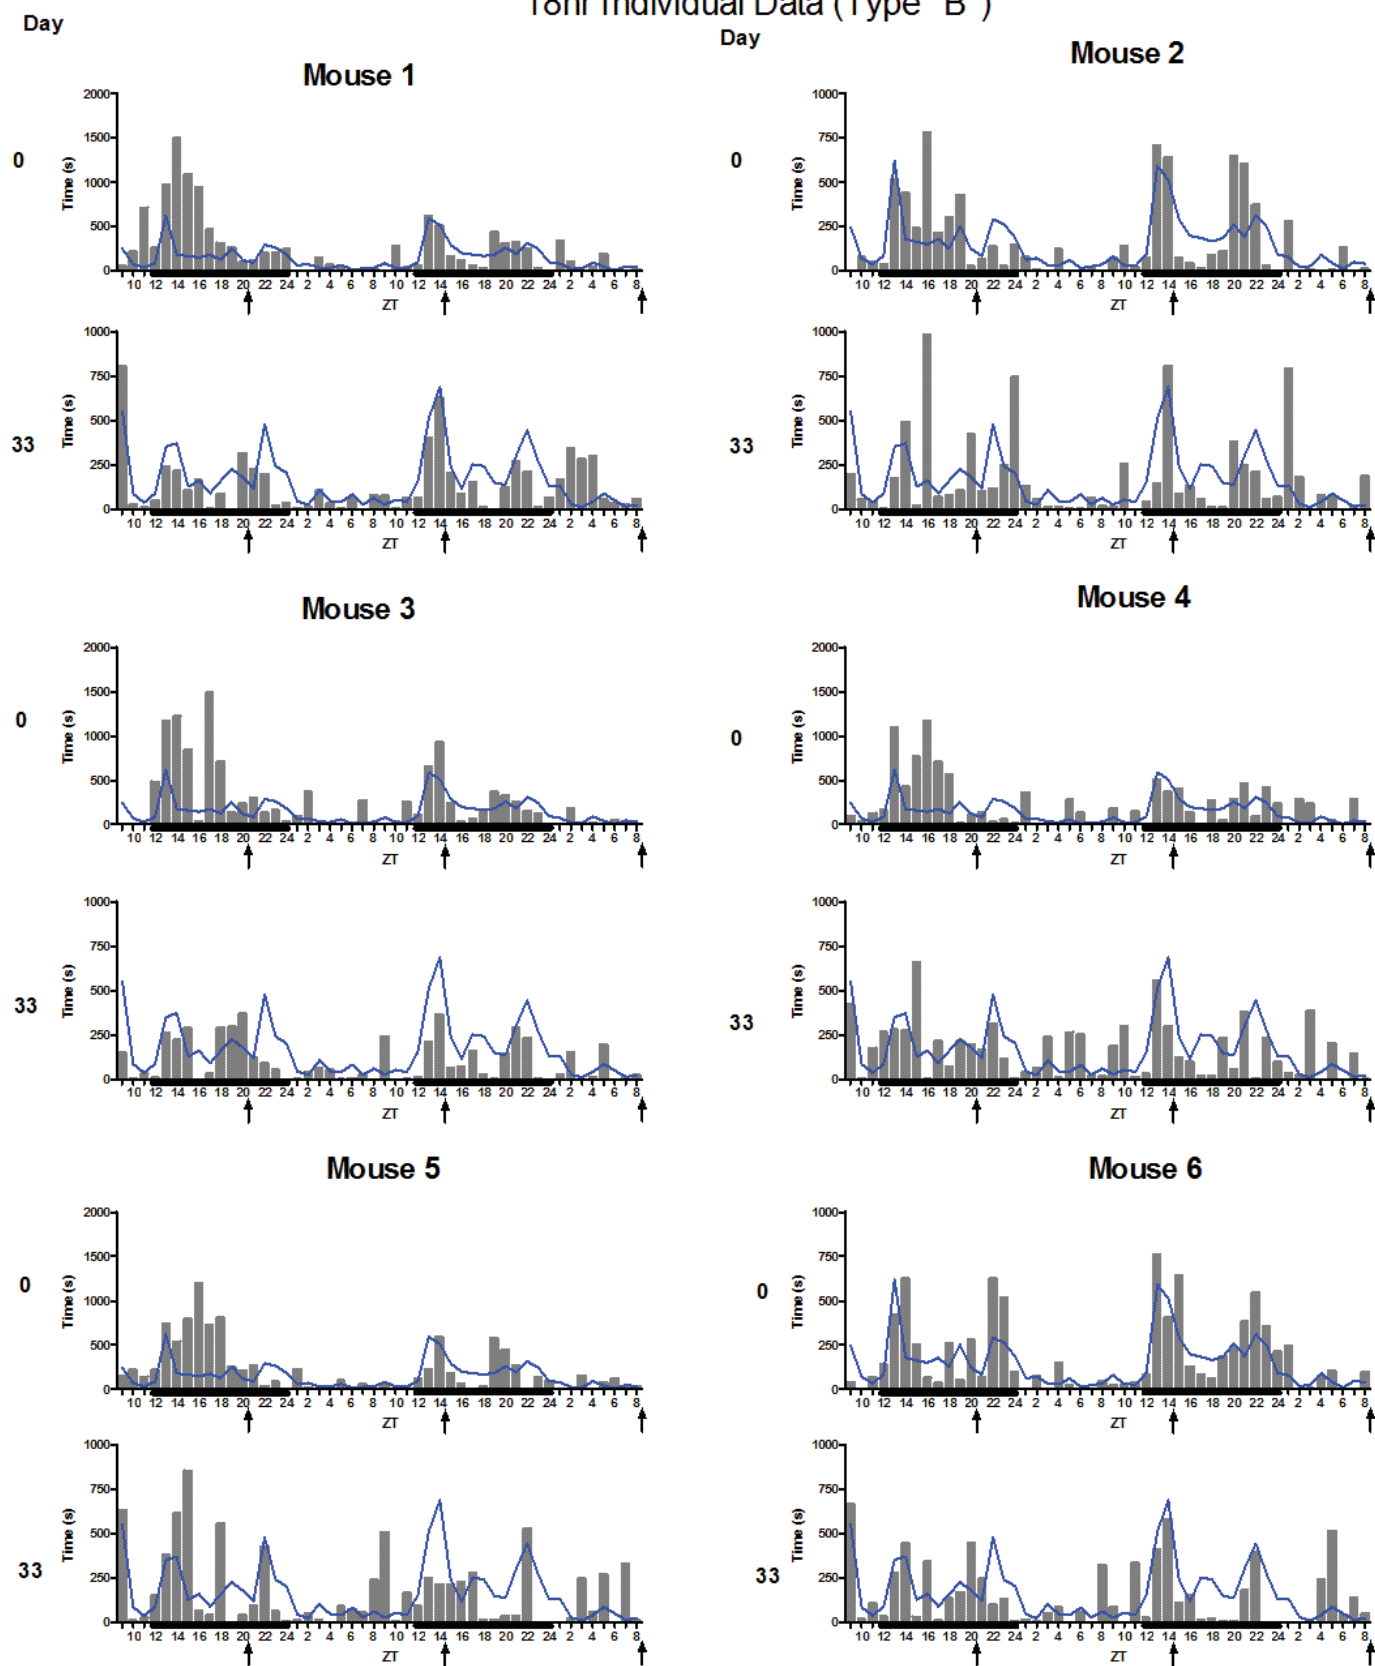

Day

Mouse 1

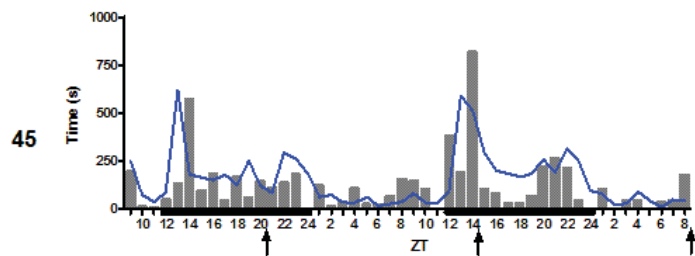

Day

Mouse 2

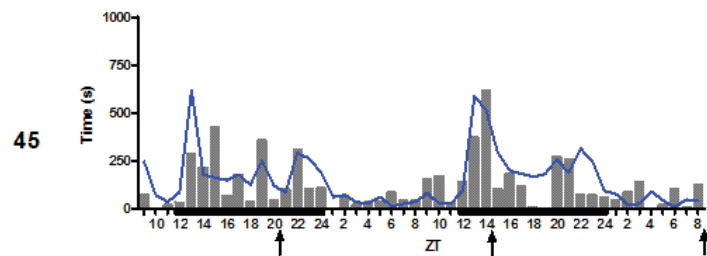

Mouse 3

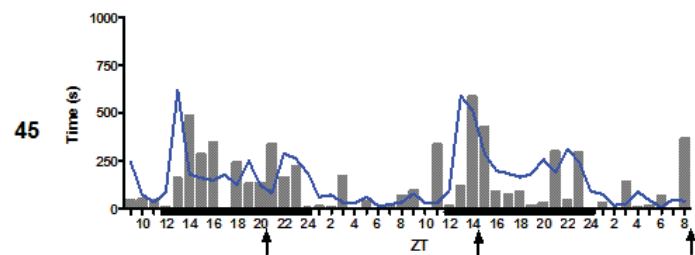

Mouse 4

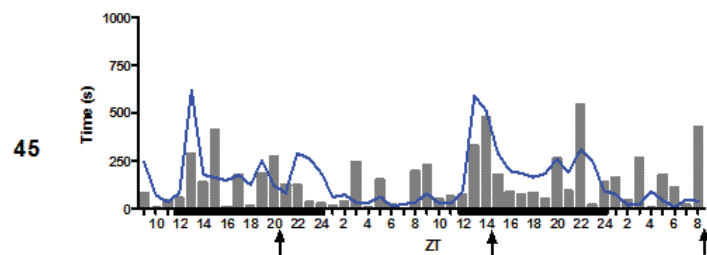

Mouse 5

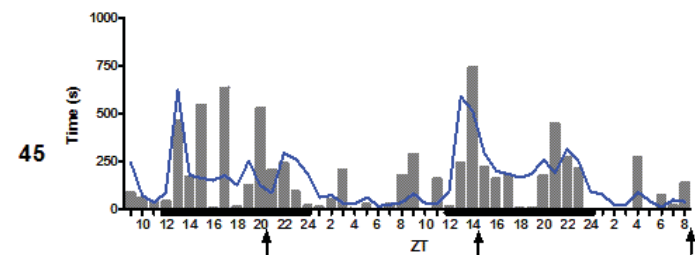

Mouse 6

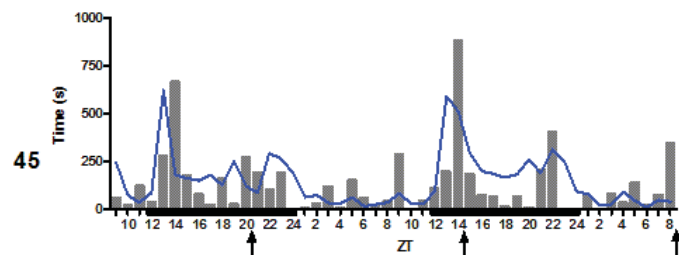

## 18 hr Individual Data (Type "C")

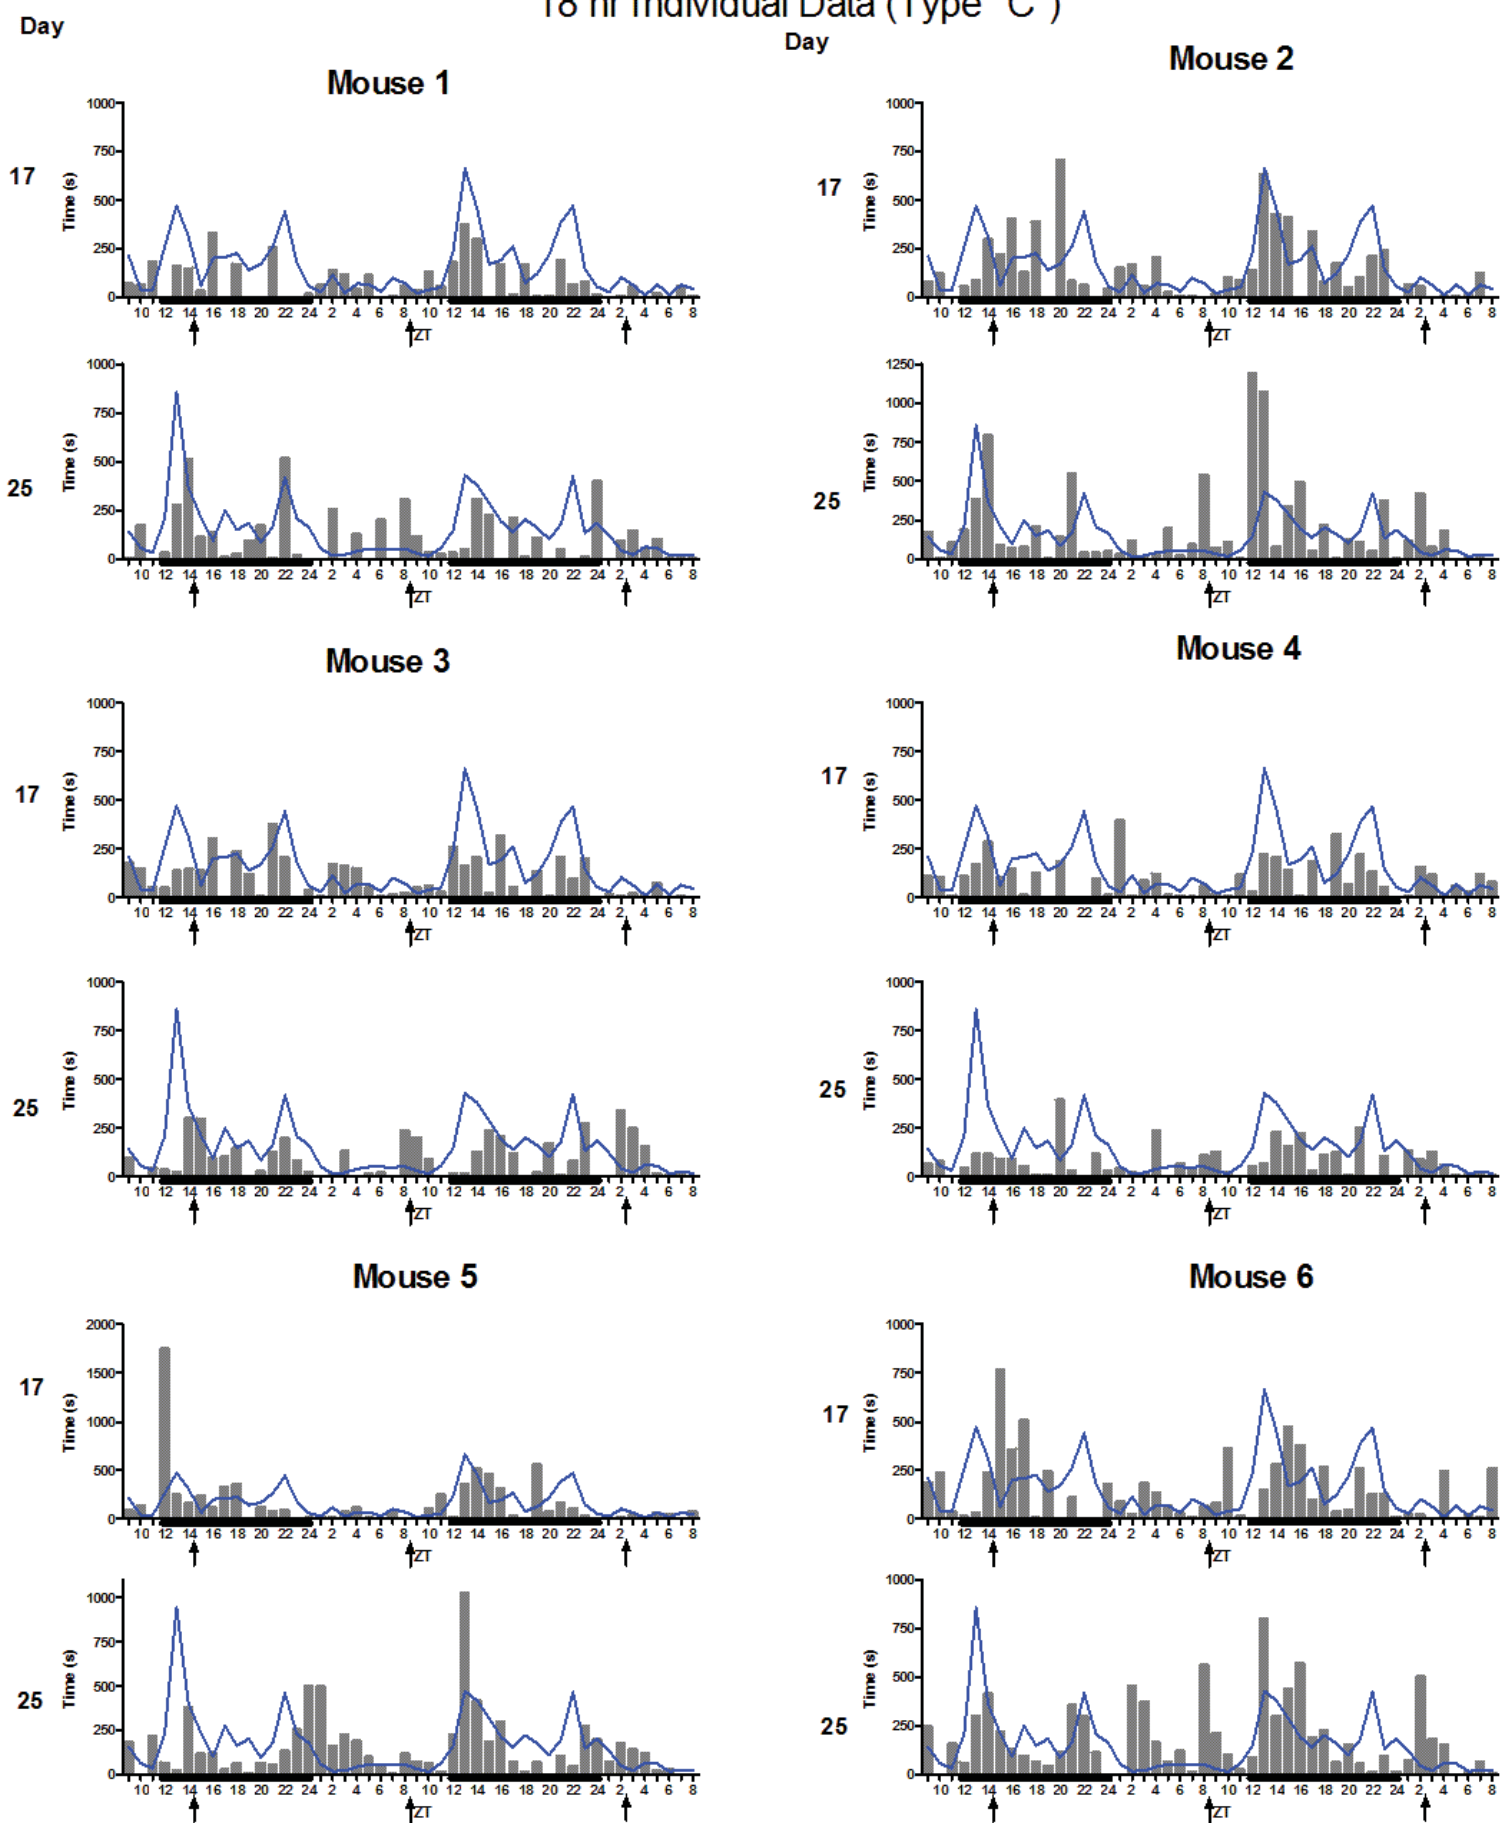

Day

Mouse 1

37

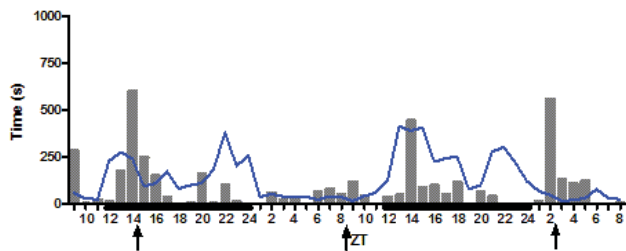

Day

Mouse 2

37

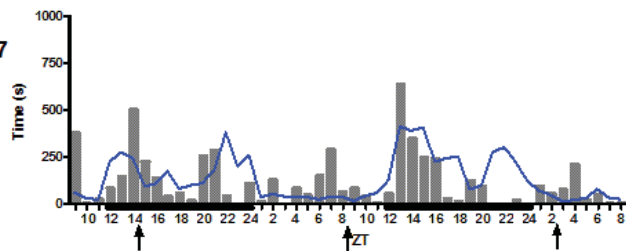

Mouse 3

37

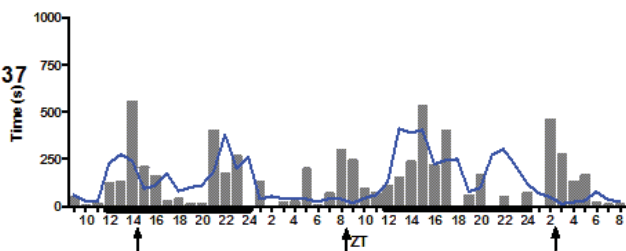

Mouse 4

37

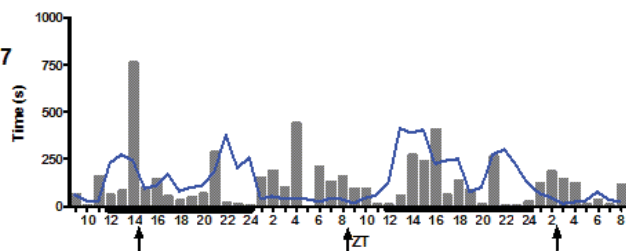

Mouse 5

37

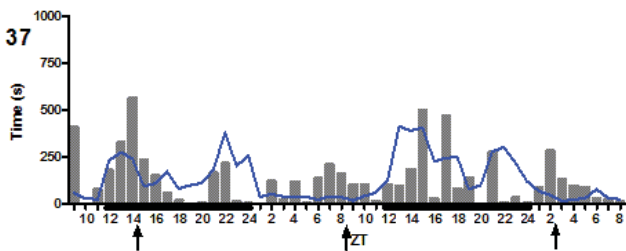

Mouse 6

37

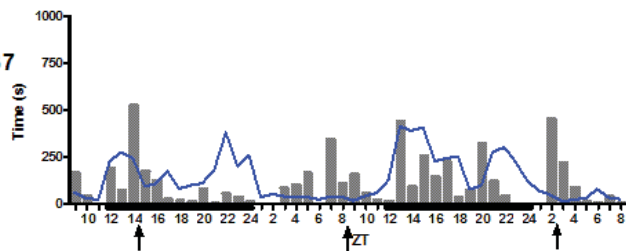

Supplement: pone.0037992.s008.pdf [file pone.0037992.s008.pdf]
