# Supplementary material for: Food Anticipatory Activity Behavior of Mice across a Wide Range of Circadian and Non-Circadian Intervals
Source: PubMed Central journal article supplement (PMC3360658; doi:10.1371/journal.pone.0037992), 2012-05-25
Supplement: pone.0037992.s004.pdf [file pone.0037992.s004.pdf]

Day

**Mouse 1**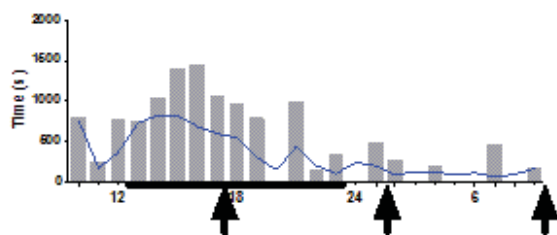

Day

**Mouse 5**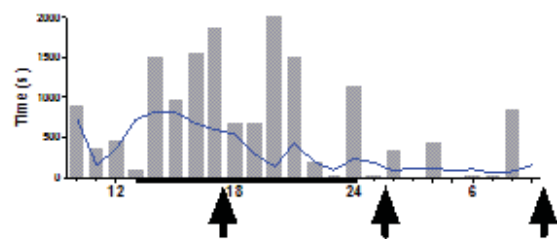**Mouse 2**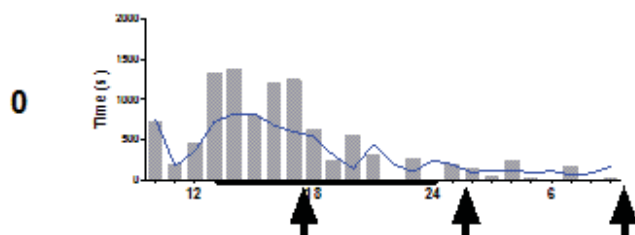**Mouse 6**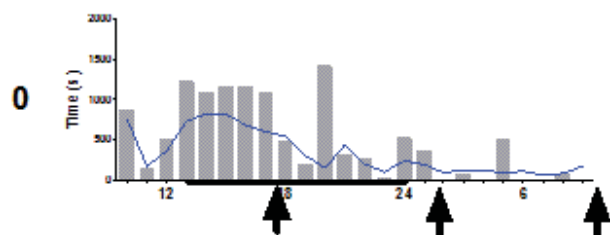**Mouse 3**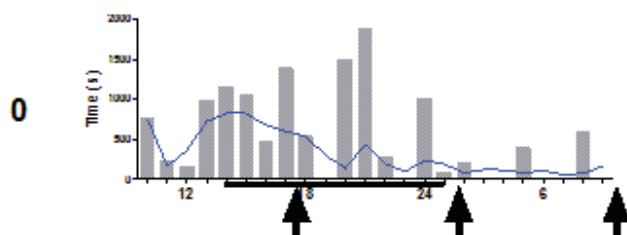**Mouse 7**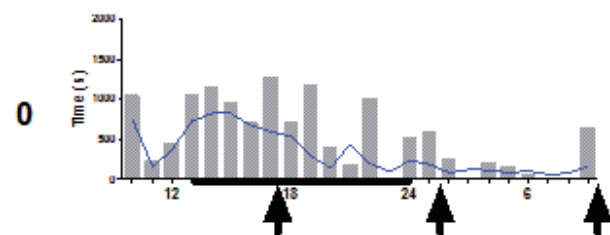**Mouse 4**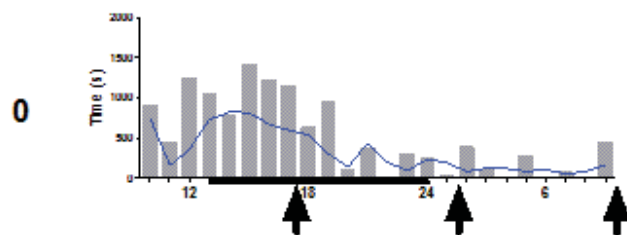**Mouse 8**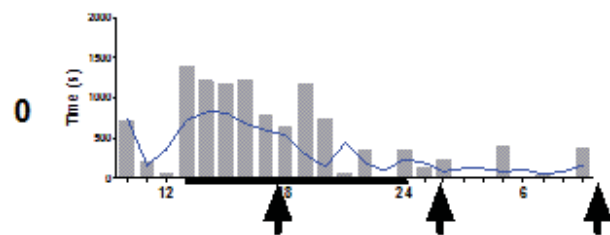

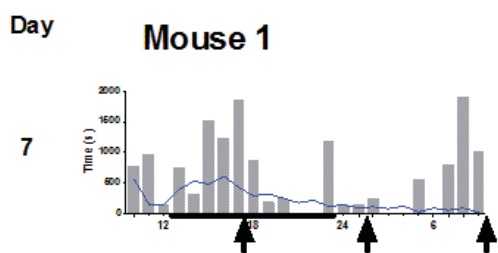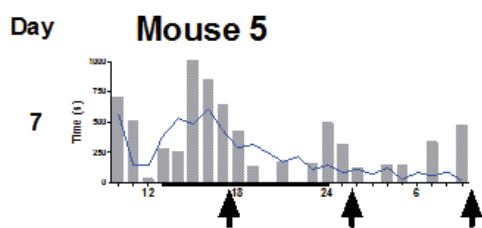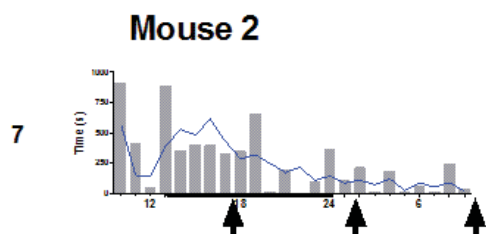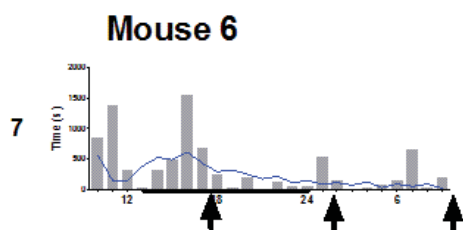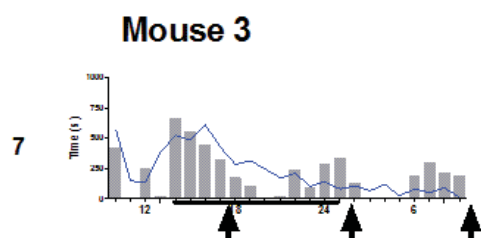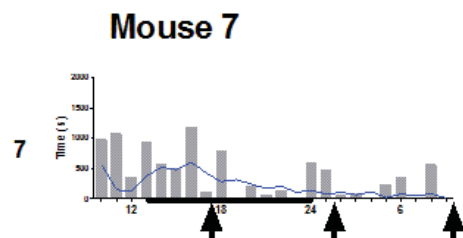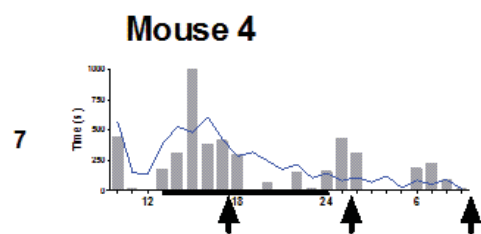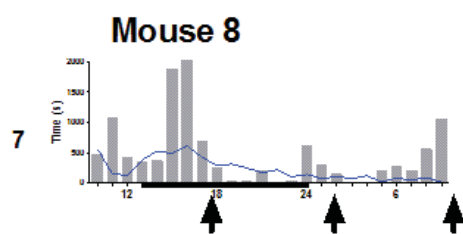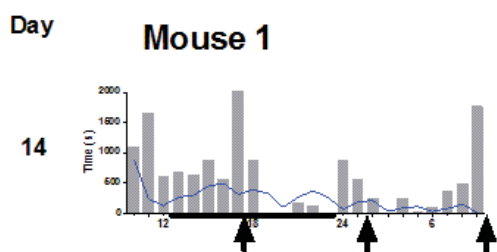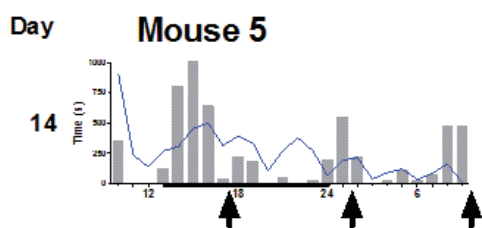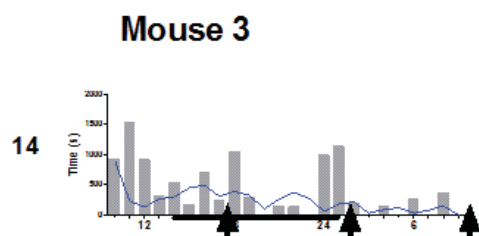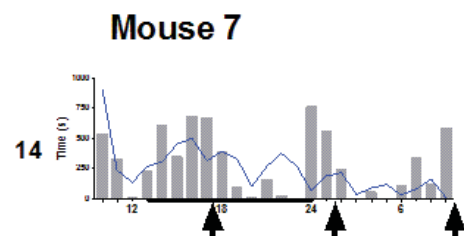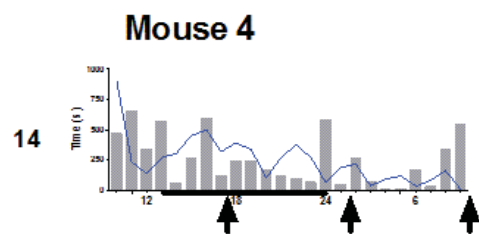

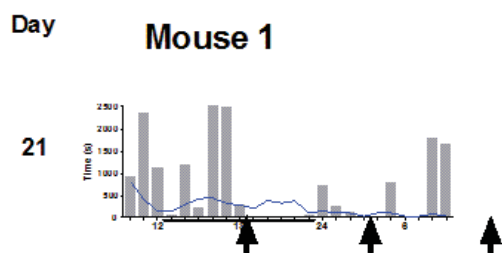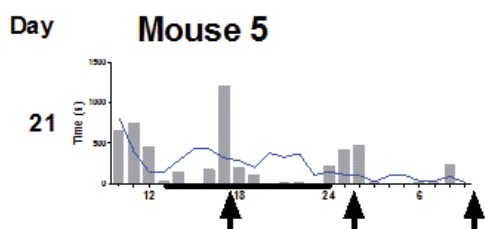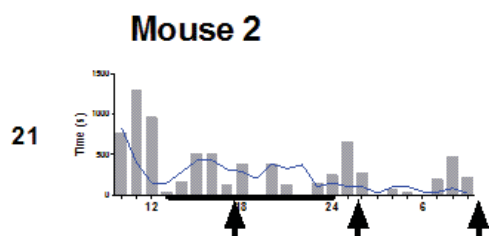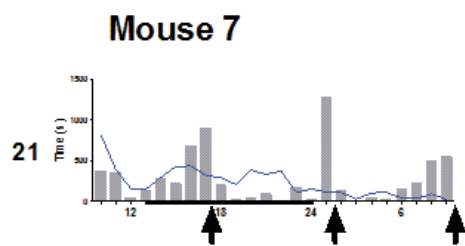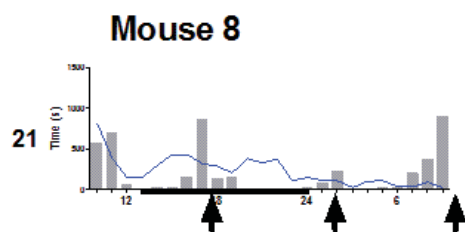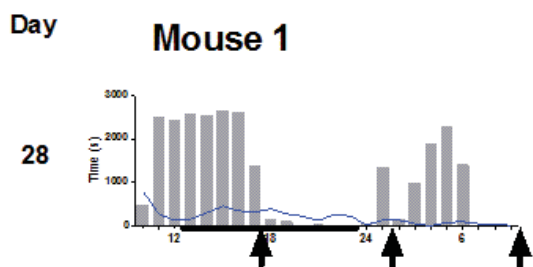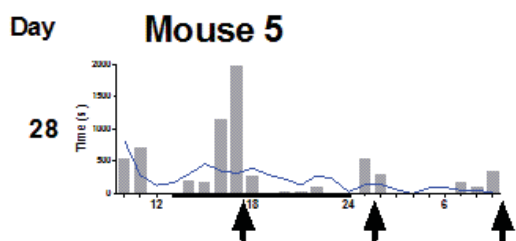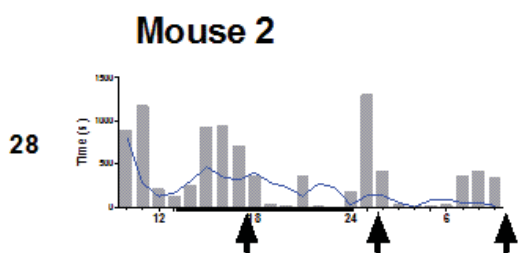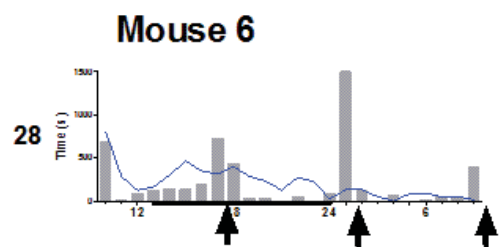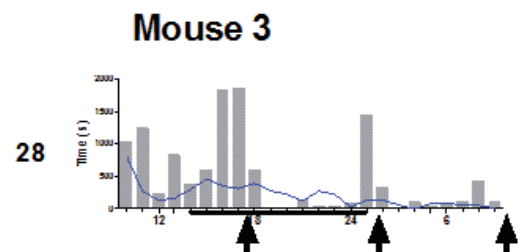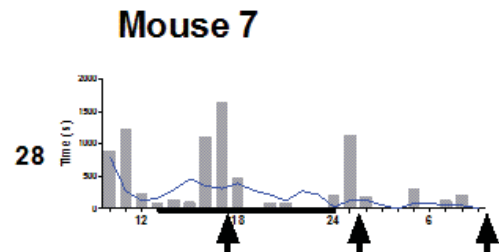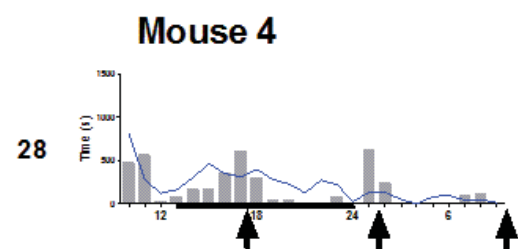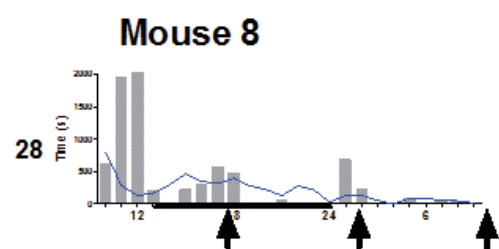

Day

**Mouse 1**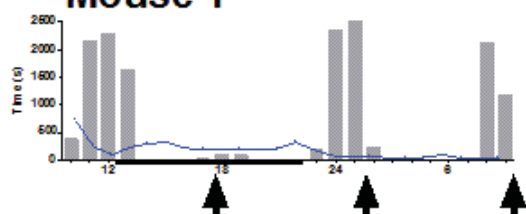

35

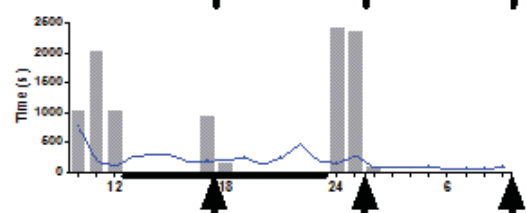

42

**Mouse 2**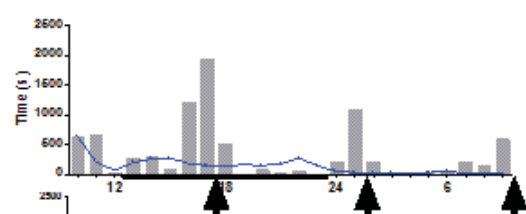

35

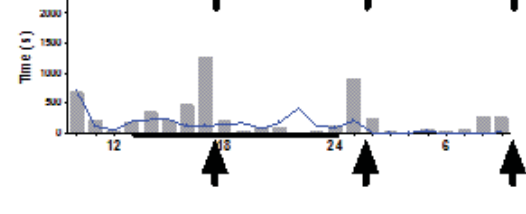

42

**Mouse 3**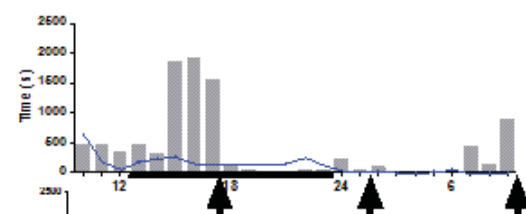

35

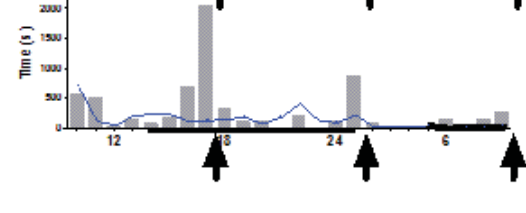

42

**Mouse 4**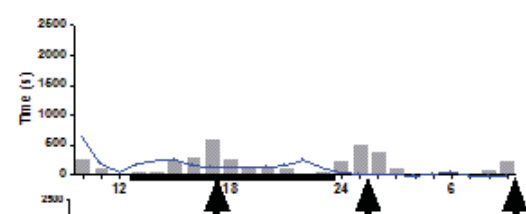

35

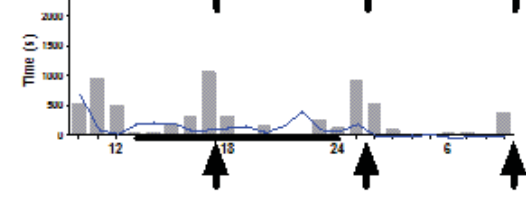

42

Day

**Mouse 5**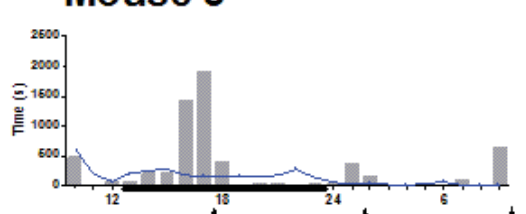

35

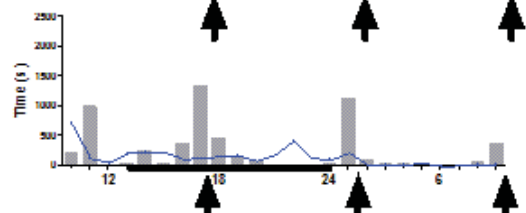

42

**Mouse 6**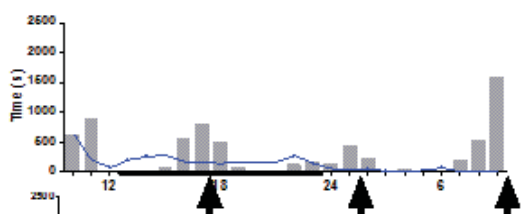

35

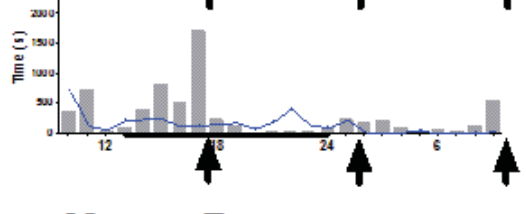

42

**Mouse 7**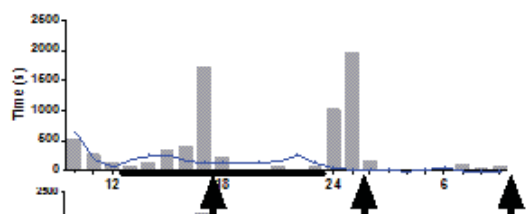

35

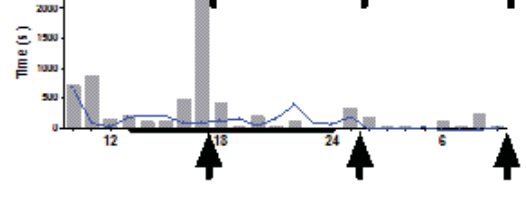

42

**Mouse 8**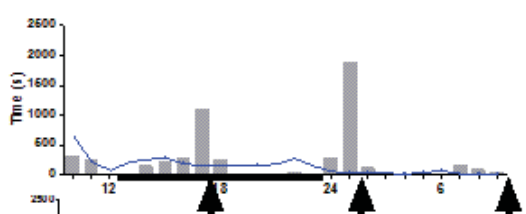

35

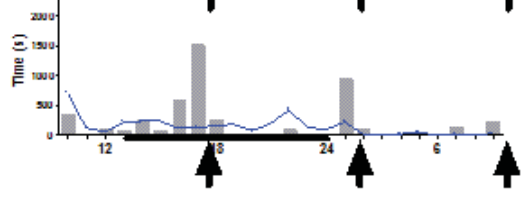

42
