# Supplementary material for: Food Anticipatory Activity Behavior of Mice across a Wide Range of Circadian and Non-Circadian Intervals
Source: PubMed Central journal article supplement (PMC3360658; doi:10.1371/journal.pone.0037992), 2012-05-25

**Meal Duration (10% CR/meal)**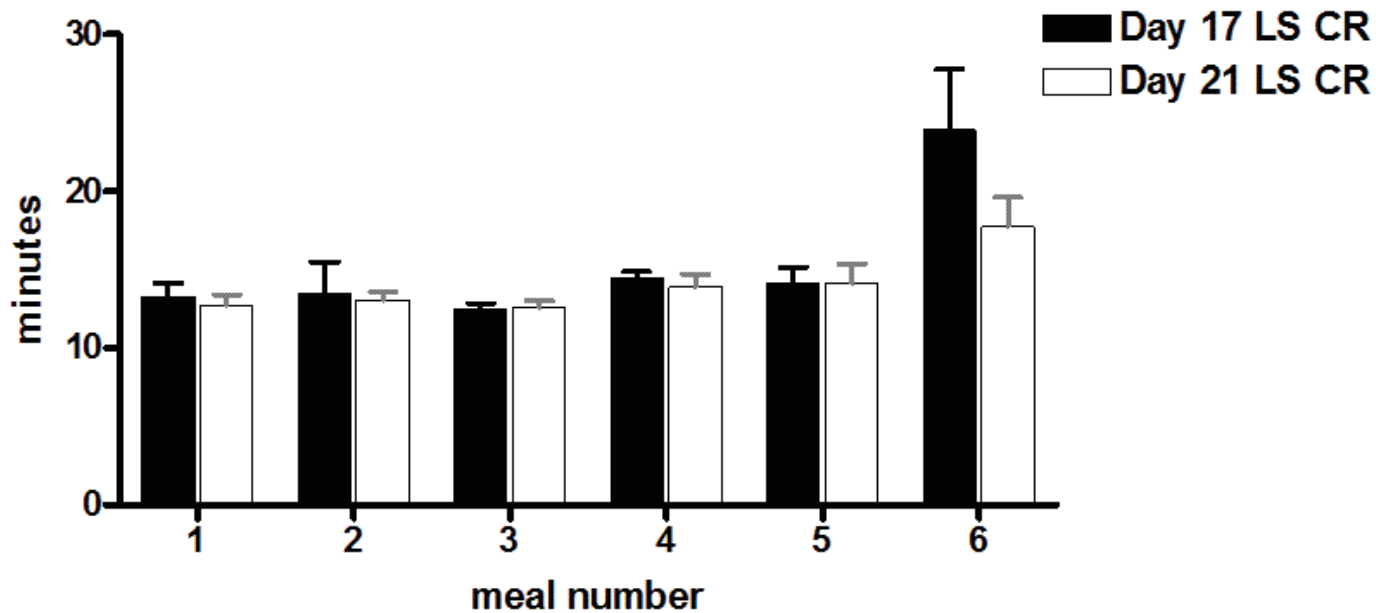

Supplement: pone.0037992.s013.pdf [file pone.0037992.s013.pdf]
